# Supplementary material for: Measuring dielectric properties for microwave-assisted extraction of essential oils using single-mode and multimode reactors
Source: PubMed Central journal article supplement (PMC9060669; doi:10.1039/c8ra08727j), 2019-02-12
Supplement: RA-009-C8RA08727J-s001.pdf [file RA-009-C8RA08727J-s001.pdf]

## **Measuring Dielectric Properties for Microwave-Assisted Extraction of Essentials Oils via single mode and multimode reactors**

Carlos A. Parizotto,<sup>a</sup> Evandro L. Dall'Oglio,<sup>a\*</sup> Leonardo G. de Vasconcelos<sup>a</sup>, Paulo T. de Sousa Jr.,<sup>a</sup> Eduardo G. R. Taques Filho<sup>a</sup>, Carlos Alberto Kuhnen<sup>b</sup>

<sup>a</sup> *Departamento de Química Universidade Federal do Mato Grosso Av. Fernando Corrêa da Costa s/n, Coxipó, Cuiabá – MT, CEP:78090-600;* <sup>b</sup> *Departamento de Física – Universidade Federal do Santa Catarina; Campus Universitário Trindade Florianópolis-SC - CEP 88040-970*

### **SUPPLEMENTARY DATA**

#### **I. Dielectric Properties**

**Cylindrical single-mode reactors via measured dielectric properties .....S2 – S5**

**References .....S6**

**Equipments ..... S6 -S7**

##### **Measurements**

Pure water .....S8

Dry Plants .....S9 – S12

Plant/water mixtures .....S13- S16

Tables of dielectric properties .....S17-S19

#### **II. Diameters of the dielectric samples in cylindrical cavities ..... S20 -S32**

Dielectric properties of pure liquids, ethanol, methanol and glycerin .....S20 -S21

Diameters of the dielectric samples: ethanol, methanol and glycerin ..... S22 – S27

Diameters of the dielectric samples: plant/water mixtures ..... S28 – S32

#### **III. Chromatograms of the Essentials oils extracted by MAE ..... S33 -S37**

Chromatograms of the experiments of table 4 ..... S33

Chromatograms of the experiments of table 5 ..... S34- S36

Chromatograms of the experiments of table 6 ..... S37

#### **IV. Chemical Compositions of the Essentials oils extracted by MAE.....S38**

## Cylindrical single-mode reactors via measured dielectric properties

Nowadays microwave dielectric heating can be viewed as a tool for sustainable green chemistry, being a very promising procedure, which has been used successfully in several branches of chemistry.<sup>1</sup> Microwave energy consists of electromagnetic radiation in the frequency range 0.3 to 300 GHz whose electrical field interacts with ions and molecular dipole moments generating heating by friction. Conventional heating of thick materials is a slow process relying on heat conduction from the outer layers towards the interior. On the contrary, high frequency electromagnetic waves are efficiently transferred to the material and MW energy is absorbed throughout the volume of the sample. When plant is heated via microwaves, the water inside the cells reaches the boiling point, generating steam by raising the gas pressure and subsequent generation of high pressure in the cell wall of the oil gland. The generated internal pressure reaches values such that the wall of the oil gland cell breaks down. This process greatly facilitates the release or leaching of the essential oil from the plant material into the surrounding solvent (water). If the plant material is soaked in polar solvents as water, the process can be greatly optimized. The high temperature of the cell wall of the plant can improve the dehydration process of the cellulose and decrease the resistance of the cell wall to the solvent inlet, which can thus easily penetrate the cell. In most cases, the plant material is soaked into single solvent or a mixture of solvents having high dielectric loss in order to strongly absorb the MW energy. Only in some special cases the plant material must be soaked into solvents which are transparent to microwave, mainly when the crude extract contains highly thermolabile components. These facts undoubtedly demonstrate the importance of the knowledge of the dielectric properties of dry plants and their water mixtures.

Dielectric properties of materials are defined by their relative complex permittivity  $\hat{\epsilon} = \epsilon' - j\epsilon''$  where the real part  $\epsilon'$  is the relative dielectric constant and  $\epsilon'' = (\epsilon'' + \sigma / \omega\epsilon_0)$  is the dielectric loss factor of the material with  $\sigma$  being the conductivity and  $\epsilon''$  the imaginary part of the relative permittivity that accounts for the dielectric relaxation process.<sup>1-5</sup> In continuous media, electromagnetic energy dissipation occurs mainly by the mechanisms of ionic conduction and dipolar rotation. Inter- and intra-molecular frictions are created by the interaction of ions and dipoles with the oscillating electrical field generating heat throughout the volume of the material. An important parameter in describing the dielectric response of

materials to the applied MW is the loss tangent, which is defined by  $\tan \delta = \varepsilon_{ef} / \varepsilon'$ . The penetration depth ( $D_p$ ), the distance at which the amplitude of the electrical field is damped to  $1/e = 0.369$  of its initial value at the surface of the material is related to the loss tangent

by<sup>3,4</sup>  $D_p = \frac{c}{\omega} \sqrt{\frac{2}{\varepsilon'}} \left[ \sqrt{1 + \tan^2 \delta} - 1 \right]^{-1/2}$  and therefore is frequency and temperature-dependent.

Therefore, the region of the sample where the electrical field effectively penetrates is denoted by  $D_p$ . It defines the volume of the sample where the dielectric heating effectively occurs.

Clearly the absorption of MW energy is non-uniform and the non-uniform temperature distribution inside a dielectric material is determined by the penetration depth. In continuous media the strength of the local electrical field depends on the dielectric properties of the medium ( $\varepsilon', \varepsilon_{ef}, tg\delta$ ), which, in turn, is function of the field frequency and temperature. To evaluate approximately the electrical field, it is necessary to consider the average electromagnetic power,  $\bar{P}$  ( $W$ ), dissipated by the medium. By employing Maxwell's equations, the power can be obtained as,<sup>3,4</sup>

$$\bar{P} = \frac{1}{2} \omega \varepsilon_0 \varepsilon_{ef} \int_V |\mathcal{E}|^2 dv \cong \omega \varepsilon_0 \varepsilon_{ef} \mathcal{E}_{rms}^2 V, \quad (1)$$

where the electrical field,  $\mathcal{E}$ , inside the volume  $V$  of the material is substituted by its root mean square (*rms*) value,  $\mathcal{E}_{rms}$ . In equation (1)  $\varepsilon_0$  is the vacuum permittivity ( $=8.85 \times 10^{-12}$   $F/m$ ),  $\varepsilon_{ef}$  is the dielectric loss factor and  $\mathcal{E}_{rms}$  is the *rms* value of the applied oscillating electrical field ( $V/m$ ) with frequency  $f$  in hertz ( $\omega = 2\pi f$ , is the angular velocity in rad/s) over the volume  $V$  ( $m^3$ ) of the sample. To calculate the *rms* value of the electrical field it can be considered the average power absorbed by the medium by taking the volume  $V$  of the material determined by the penetration depth ( $D_p$ ), the volume where the medium effectively absorbs the electromagnetic energy, that is  $V \cong D_p^3$ .

Microwave heating of the materials are done in multimode and single-mode cavities. A disadvantage of multimode cavities is due to the non-uniform distribution of the electrical field, which enhances the non-uniformity distribution of the temperature in the sample. Despite the uniform distribution of the field in single-mode cavities, they have the disadvantage of processing low amount of materials<sup>3</sup> if it is not possible to operate the cavity in a continuous flow mode. In this work, it was considered cylindrical single-mode and

multimode cavities operating as MW reactors for MAE. Since for single-mode cavities the theoretical approach is straightforward, in this work it was considered the Transverse Magnetic (TM) and Transverse Electric (TE) modes in cylindrical cavities with height  $h$ , where a dielectric sample (radius  $R_a$ ) is inserted in a hollow cylinder of Teflon (Fig. S1), whose external radius is equal to the internal radius of the cylindrical inox cavity, that is  $R_t=R_c$ .

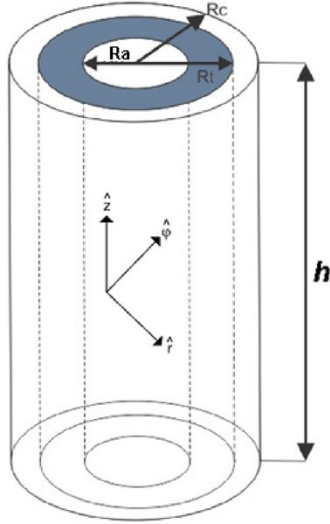

Fig. S1. Cylindrical reactor.  $R_a$  is the dielectric sample radius inserted into the reactor.  $R_t$  is the external radius of the Teflon.  $R_c$  is the internal radius of the inox cavity.  $\hat{r}$ ,  $\hat{\phi}$  and  $\hat{z}$  are the unit vectors in cylindrical coordinates.

Since the height  $h$  of the cylinder can be taken as variable, it will be considered the  $TM_{010}$  and  $TE_{111}$  fundamental modes. For an empty cavity  $TM_{010}$  is the fundamental mode when  $h < 2.03R_c$ . However, if  $h > 2.03R_c$ , then the frequency of the  $TE_{111}$  mode is lower than that of the  $TM_{010}$  mode and, therefore, the  $TE_{111}$  mode will be the fundamental mode.<sup>4</sup> When a dielectric is inserted into the region  $0 \leq r \leq R_a$  and the region  $R_a \leq r \leq R_c$  is occupied by Teflon (cavity/load separator) the solutions of the Maxwell equations for the electric and magnetic components of  $TM_{010}$  mode are:<sup>4</sup>

$$E_{1z} = E_0 J_0(k_1 r) \quad 0 \leq r \leq R_a \quad (2)$$

$$H_{1\phi} = -i \sqrt{\frac{\varepsilon}{\mu}} E_0 J_1(k_1 r)$$

$$E_{2z} = A_1 J_0(k_2 r) + A_2 Y_0(k_2 r) \quad R_a \leq r \leq R_c \quad (3)$$

$$H_{2\phi} = -i \sqrt{\frac{\varepsilon_T}{\mu_T}} [A_1 J_1(k_2 r) + A_2 Y_1(k_2 r)]$$

where  $J_0$  and  $J_1$  are Bessel functions of zeroth and first order respectively and  $Y_0$  and  $Y_1$  are Neumann functions of zeroth and first order respectively. In the above equations  $\varepsilon$  and  $\varepsilon_T$  are

the dielectric constant of the dielectric sample and Teflon respectively ( $\epsilon_T = 2.1$ ), whereas  $k_1$

and  $k_2$  are given by:  $k_1 = \frac{\omega}{c} \sqrt{\epsilon'}$ ;  $k_2 = \frac{\omega}{c} \sqrt{\epsilon_T}$ . If the sample has an appreciable loss factor,  $k_1$

is given by  $k_1 = \frac{\omega}{c} \sqrt{\frac{\epsilon'}{2} \left[ \sqrt{1 + \tan^2 \delta} + 1 \right]^{1/2}}$ ,  $c$  is the light velocity and  $\omega$  is the angular

velocity of the microwaves,  $\omega = 2\pi f$ . The boundary conditions for the electric and magnetic components at  $r = R_a$  and at  $r = R_c$  (continuity of the tangential components) gives the transcendental equation that controls resonance in the cavity with the presence of the dielectric sample:

$$\sqrt{\frac{\epsilon'}{\epsilon_T}} \frac{J_1(k_1 R_a)}{J_0(k_1 R_a)} = \frac{J_1(k_2 R_a) Y_0(k_2 R_c) - J_0(k_2 R_c) Y_1(k_2 R_a)}{J_0(k_2 R_a) Y_0(k_2 R_c) - J_0(k_2 R_c) Y_0(k_2 R_a)} \quad (4)$$

Equation 4 tells us that the relationship between cavity radius and dielectric sample radius depends crucially on dielectric properties of the sample (Teflon is transparent to MW). Therefore, the knowledge of the dielectric properties of the sample (by measurement) makes it possible, for a given cavity radius, to obtain the allowed value of the sample radius's by the numerical solution of equation 4. In similar manner, applying the boundary conditions for the electric and magnetic components at  $r = R_a$  and at  $r = R_c$ , on the solutions of the Maxwell equations for the electric and magnetic components of TE<sub>111</sub> it affords the transcendental equation that governs resonance in such mode:

$$\sqrt{\frac{\epsilon'}{\epsilon_T}} \frac{J_1(k_1 R_a)}{J_0(k_1 R_a) - \frac{J_1(k_1 R_a)}{k_1 R_a}} = \frac{J_1(k_2 R_a) Y_1(k_2 R_c) - J_1(k_2 R_c) Y_1(k_2 R_a)}{[J_0(k_2 R_a) - \frac{J_1(k_2 R_a)}{k_2 R_a}] Y_1(k_2 R_c) - J_1(k_2 R_c) [Y_0(k_2 R_a) - \frac{Y_1(k_2 R_a)}{k_2 R_a}]} \quad (5)$$

As above, equation 5 shows the strong dependence of sample radius on cavity radius through dielectric properties of the sample inserted in the region  $0 \leq r \leq R_a$ . A FORTRAN code was developed to solve numerically equations 4 and 5 for the allowed frequencies 915 MHz and 2450 MHz and using the measured values of the dielectric properties of dry plants and their mixtures. This allows us to build reactors by finding the best internal radius ( $R_a$ ) for a specific MAHD process, based on the knowledge of dielectric properties of the material to be processed. Based on the knowledge of the dielectric properties of pure liquids, methanol, ethanol and glycerin, preliminary solutions of equations 4 and 5 were found for these liquids, and are given below in this electronic supporting information.

## References

1. Leadbeater, N. E. (editor). *Microwave Heating as a Tool for Sustainable Chemistry*, 1st ed.; CRC Press: Boca Raton, FL, 2010.
2. Gabriel, C., Gabriel, S., Grant, E. H., Halstead, B. S. J., Mingos, D. M. P., *Chem. Soc. Rev.*, 1998, **27**(3), 213–223.
3. Metaxas, A. C., Meredith, R. J. *Industrial Microwave Heating*, 2<sup>nd</sup> ed. London: Peregrinus, 1993.
4. Jackson, J. D. *Classical Electrodynamics*, 2<sup>nd</sup> ed. John Wiley & Sons Inc., 1972.
5. Gupta, M., Leong, E. W. W., *Microwave and Metals*, John Wiley & Sons (Asia) Pte Ltd, Singapore, 2007.

## Equipments

The thermally isolated microwave reactors, were machined in 304 stainless steel and consist of cylindrical resonant cavities (Figure S2). The single mode reactor (F) has an internal diameter of 99.5 mm, in which is inserted a Teflon hollow cylinder (cavity/load separator) (see Fig.S1), with height of 111 mm and inner diameter of 70 mm. The multimode reactor (I), Fig. S2, has the inner diameter of 176 mm and being 175 mm high. The reactors are supplied with electromagnetic radiation by an Alter SM 1150 and SM 1280 microwaves power supplies variable power 0.3–6.0 kW (A in Fig. S2), and Richardson Electronics TM 030 and TM P66 microwave head (B Fig. S2), emitting at 2.45 GHz with the magnetron valve water cooled with a thermostatically controlled bath (DIST DI-980).

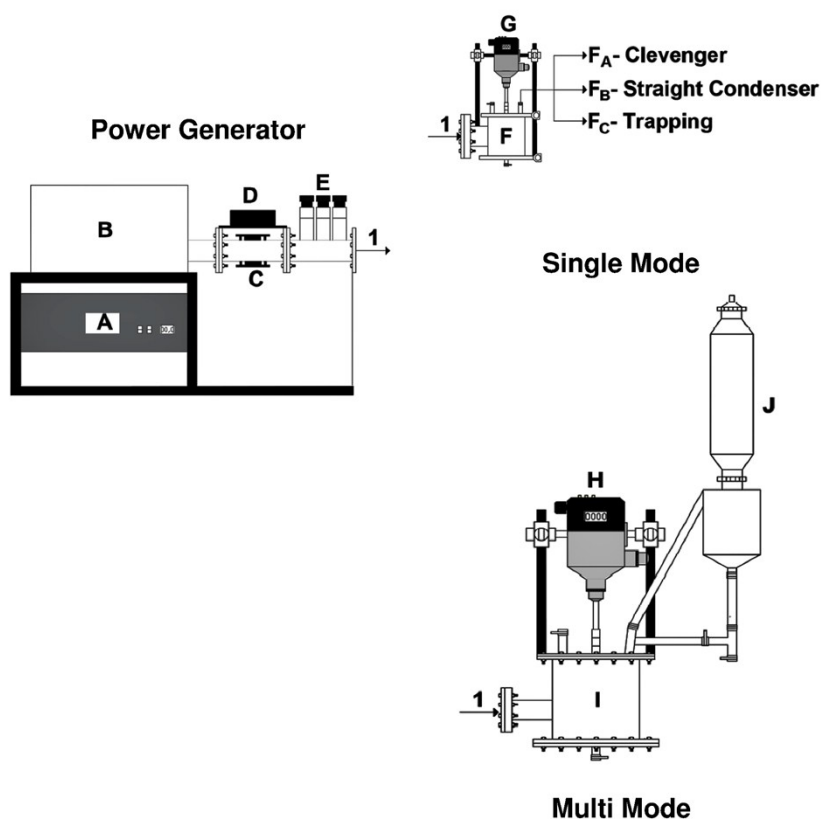

Fig S2: Single and multimode reactors for microwave assisted essentials oils extractions (see text).

The system has a directional coupler/water load (National Electronics D0937) (C Fig. S2), power sensor (Alter RD8400) (D Fig. S2), and waveguide tuner (Alter AG340M3) (E Fig. S2), and the

entire system is controlled by Front Panel 500 software. In the superior flange of single mode reactor, it was adapted a mechanical stirrer with a Teflon paddle and a connector to adapt three different systems to remove water and essential oil in vapor phase. The first is a Clevenger apparatus ( $F_A$  Fig. S2), the second is a straight condenser ( $F_B$  Fig. S2) and the third is a trapping ( $F_C$  Fig. S2). Three different approaches were used to condensate the vapor phase, a thermostatically controlled bath (Tecnal TE 184 model), a Chiller (PolyScience N0772046) and a Dewar flask with liquid nitrogen. In the Clevenger apparatus the condensate water returns to the cavity, but in the other two systems the water is continuously removed from the reactor. Connectors were adapted in both reactors to insert thermal sensors comprised of optic fibers. The temperature in the liquid phase is measured by a Neoptix optic fiber thermometer (model Reflex RFX 378A). In the experiments the energy consumption measurements were performed with a Fluke 434 power quality analyzer. Analysis of the component mixtures was performed with a GC-MS Shimadzu QP 5050A with automatic injector AOC-5000.

## 1. Pure water

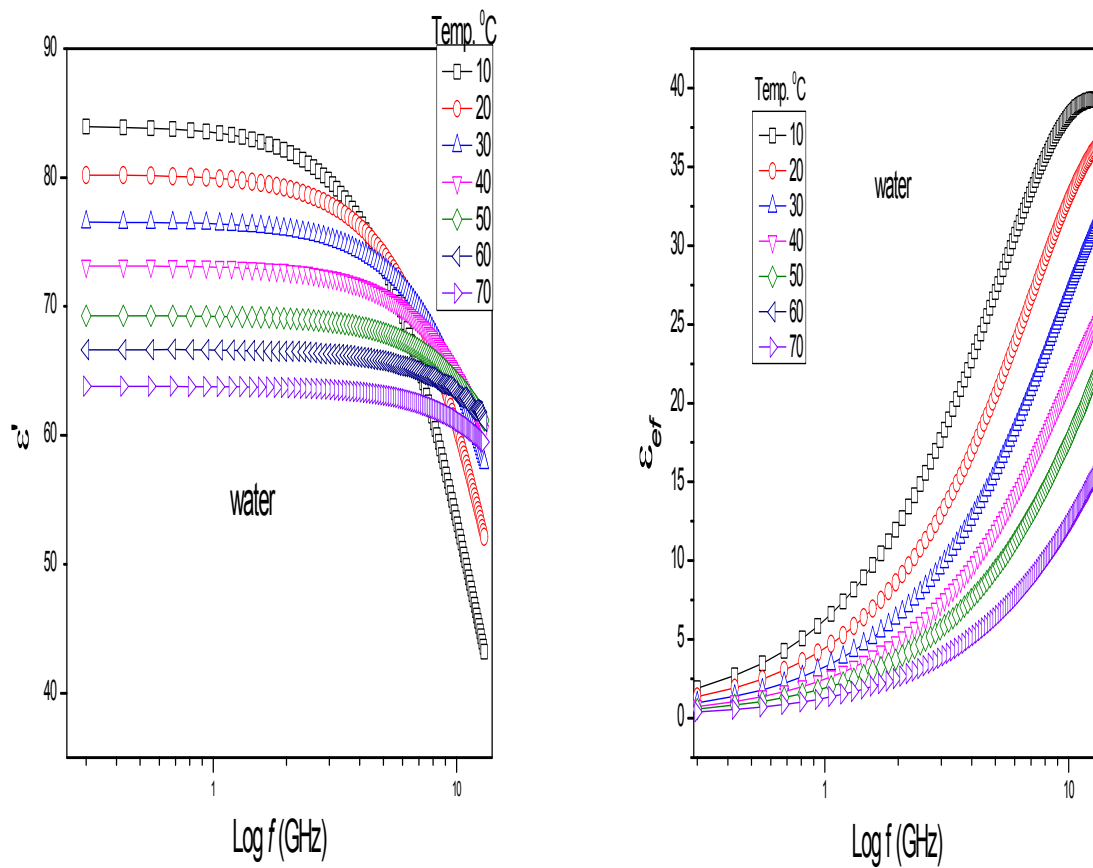

Figure S3. (a) Dielectric constant and (b) loss factor of water as function of frequency and temperature.

## 2. Dry Plants



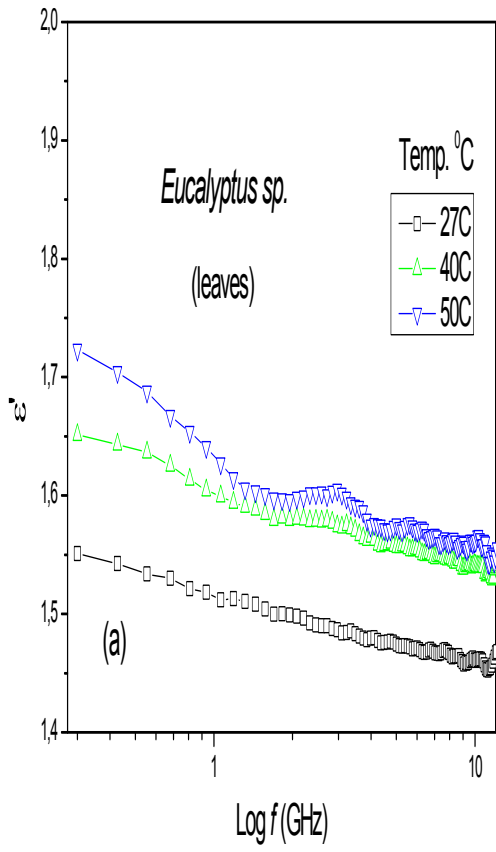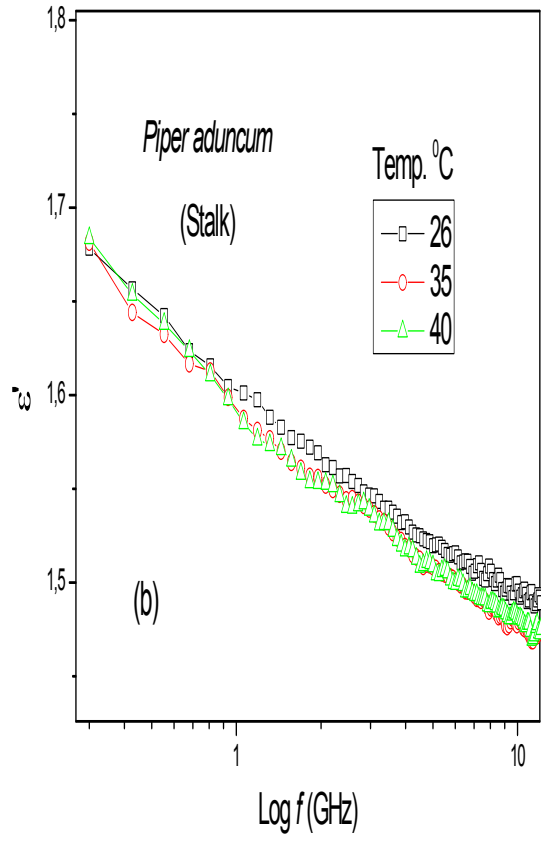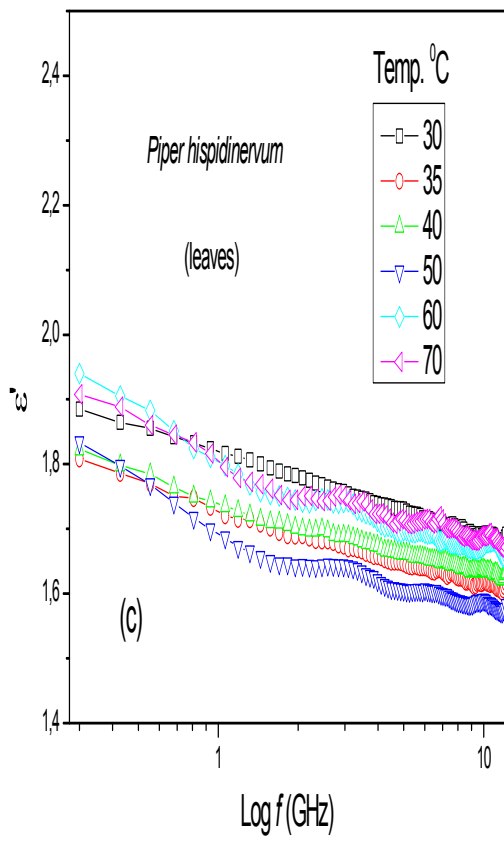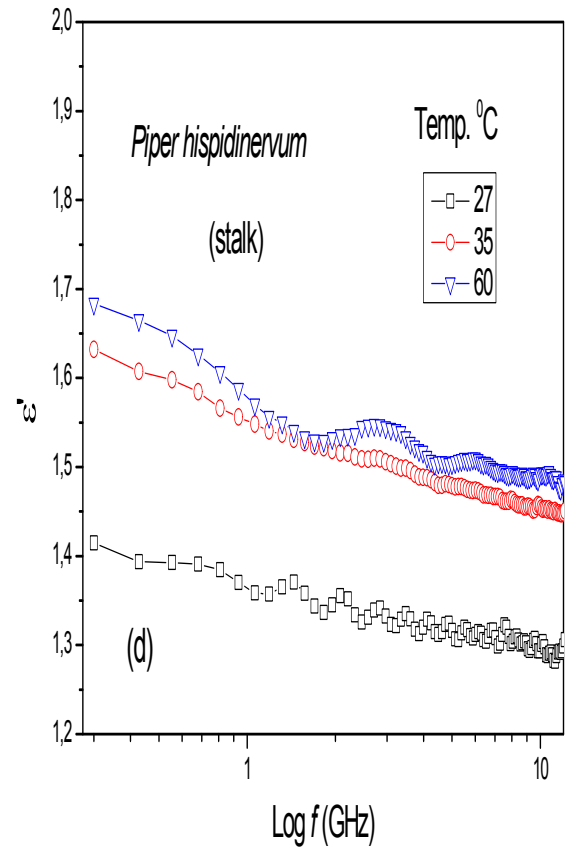

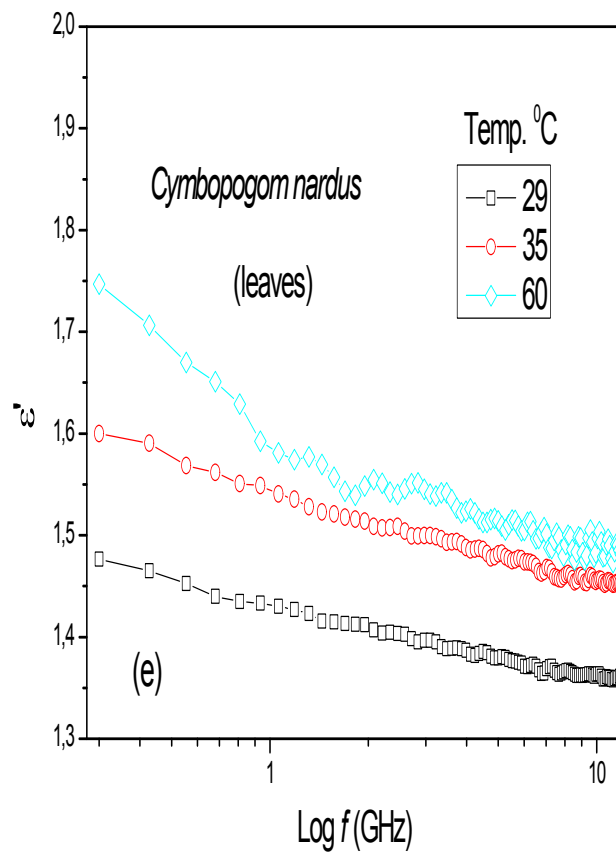

Figure S4. (a) – (e) Dielectric constant of the dry samples as function of frequency and temperature.

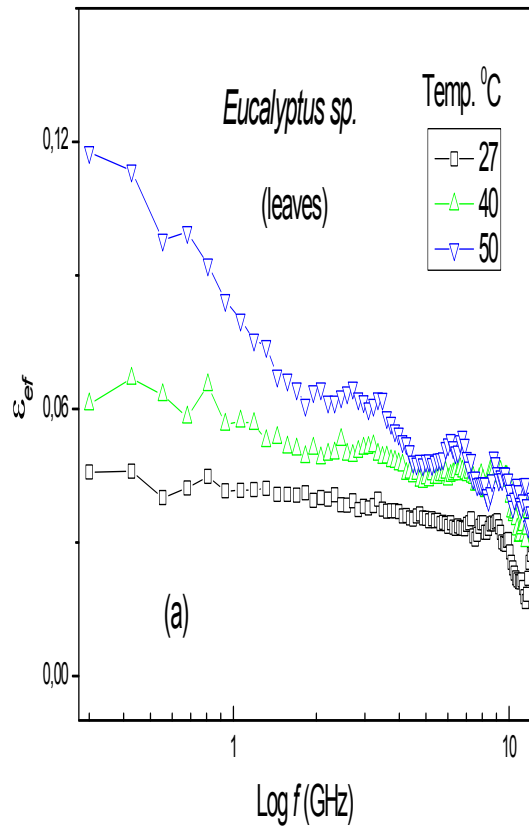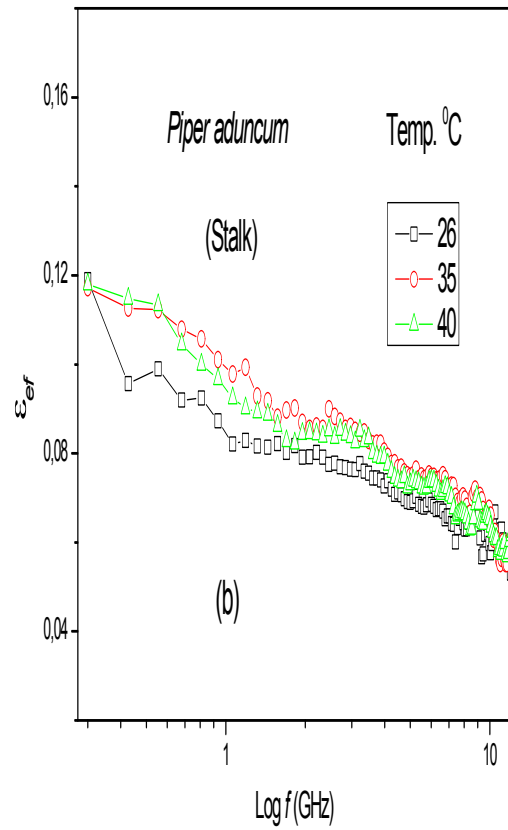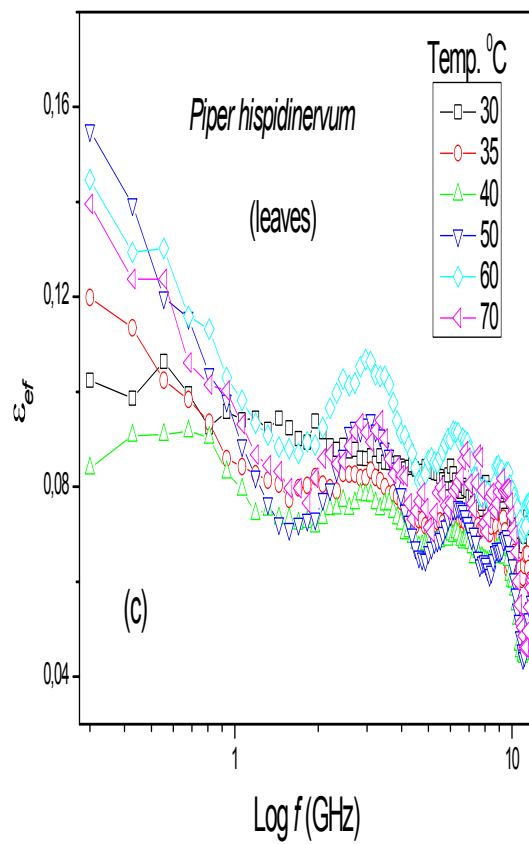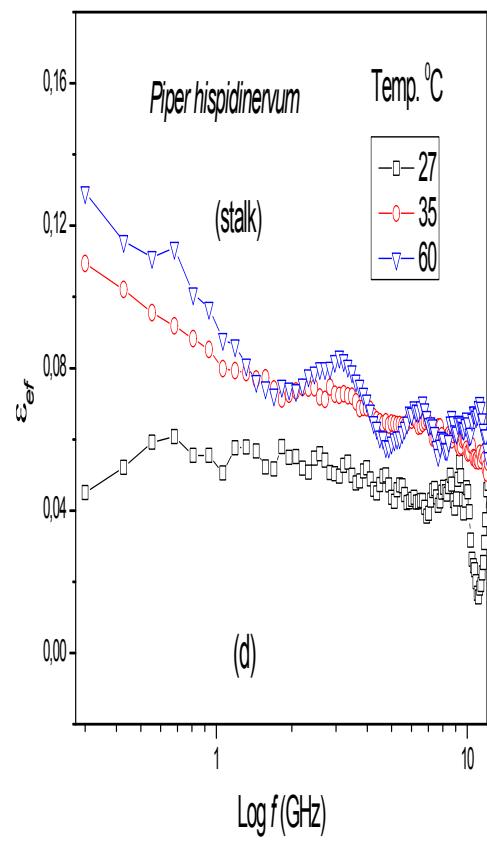

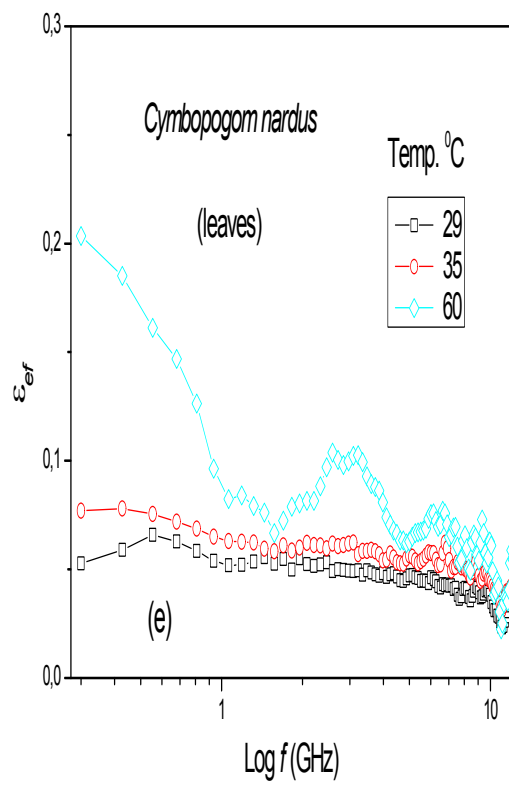

Figure S5. (a) – (e) Dielectric loss factor of the dry samples as function of frequency and temperature.

### 3. Plants/water mixtures

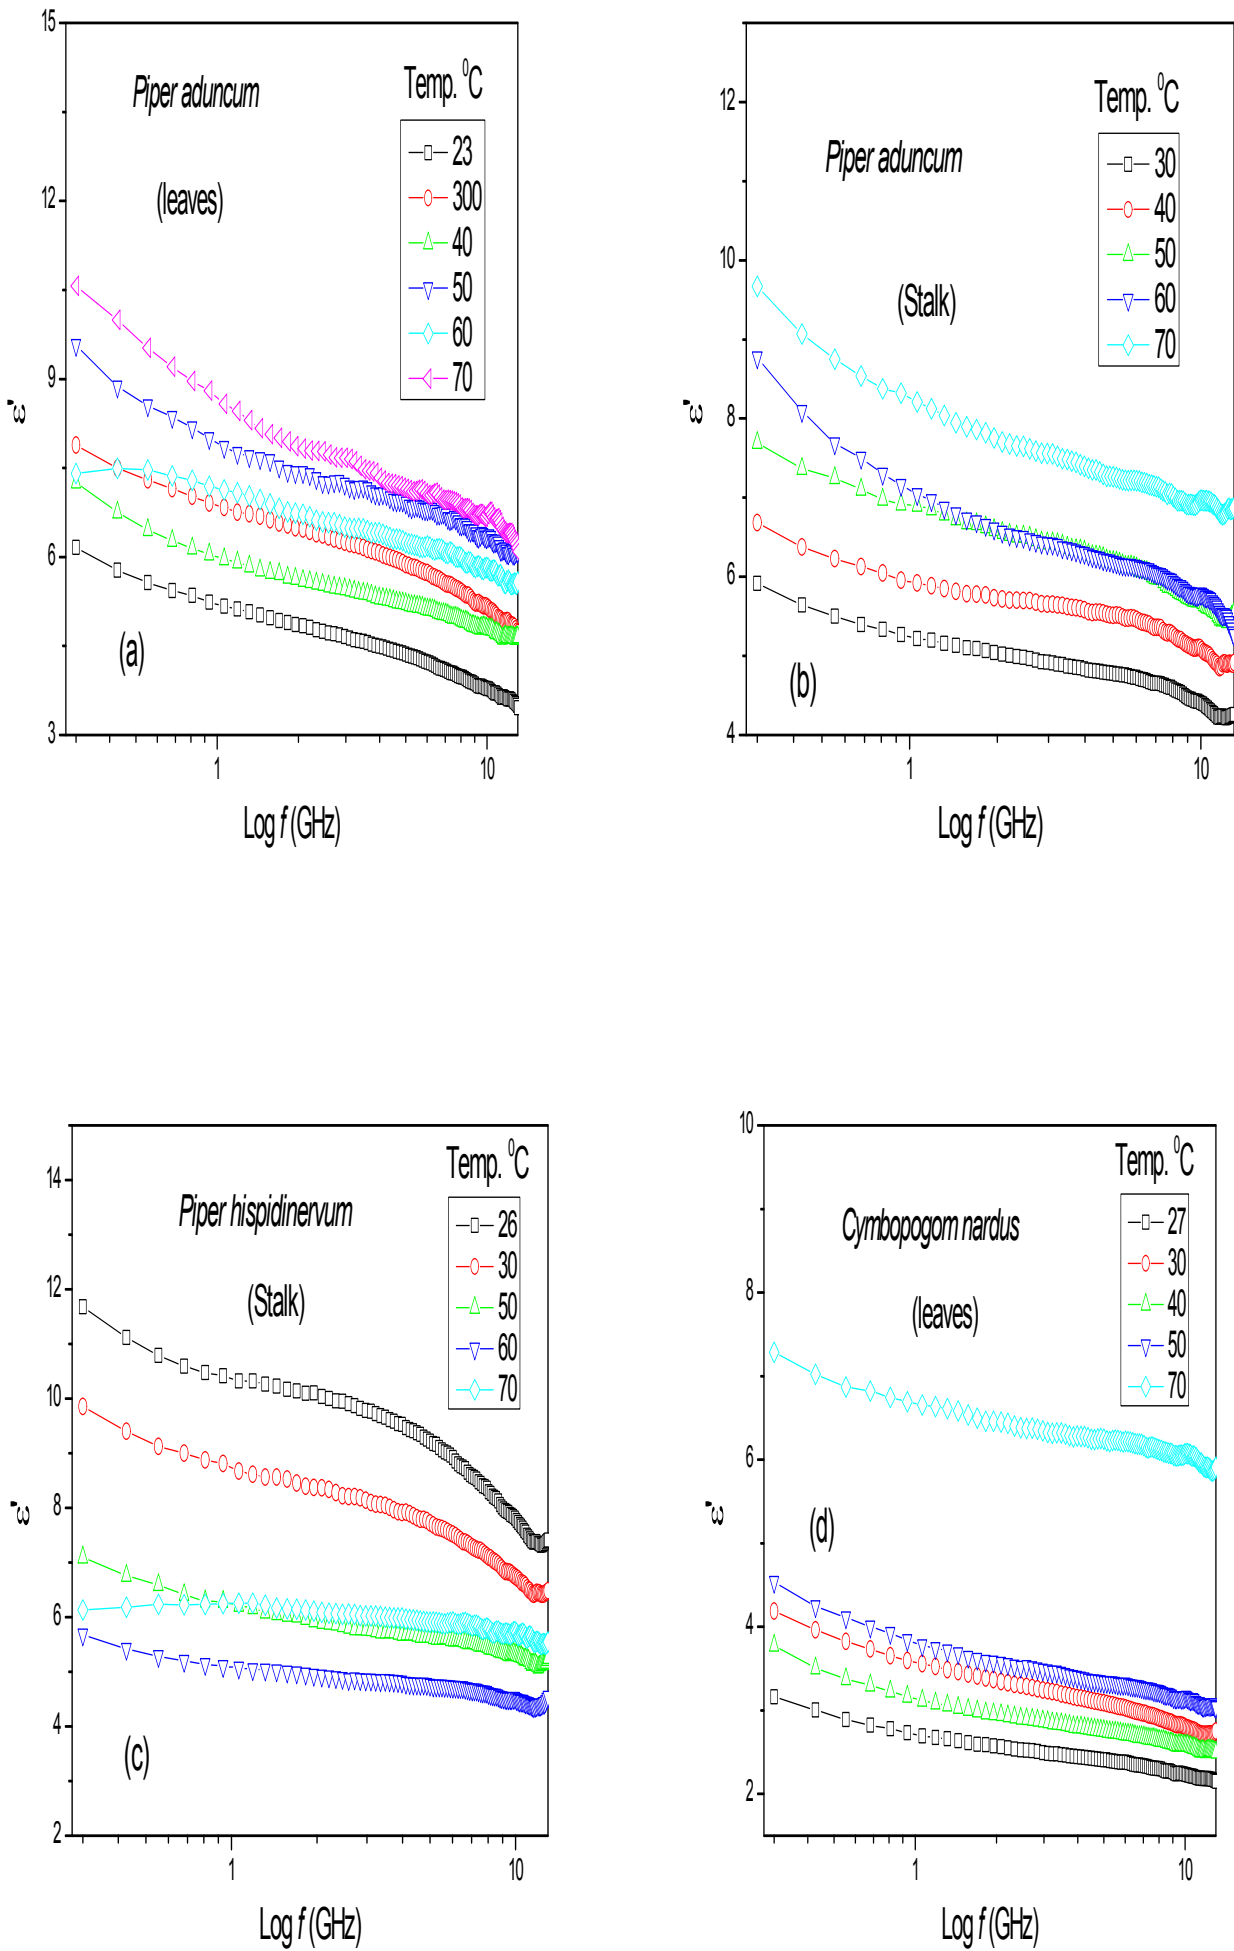

Figure S6. (a) – (d) Dielectric constant of the plant/water mixtures samples with 1:1 mass ratio as function of frequency and temperature.

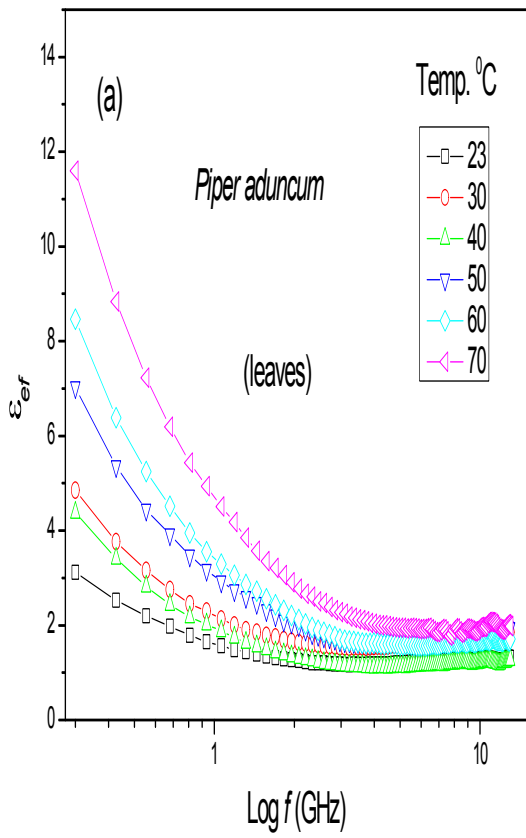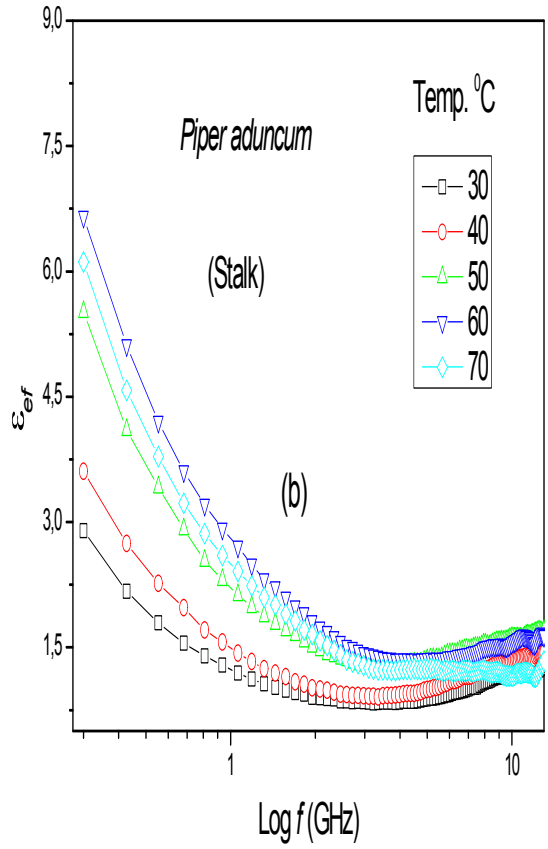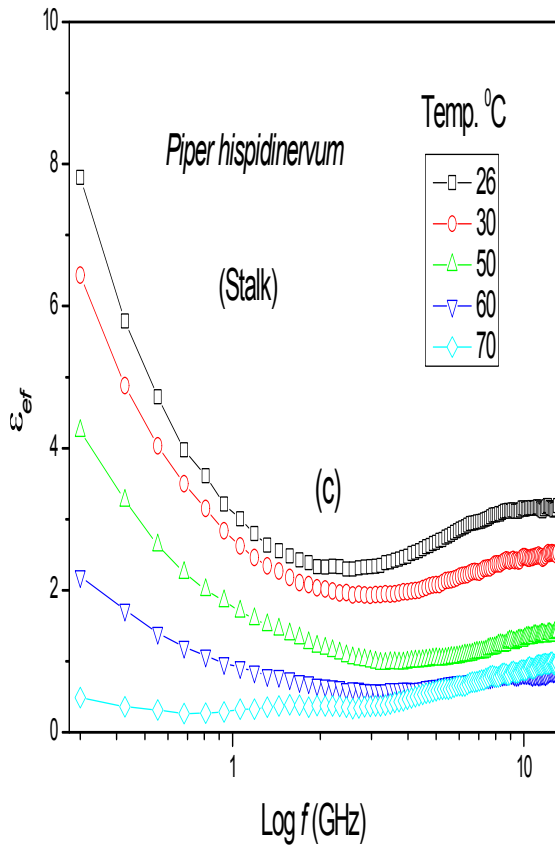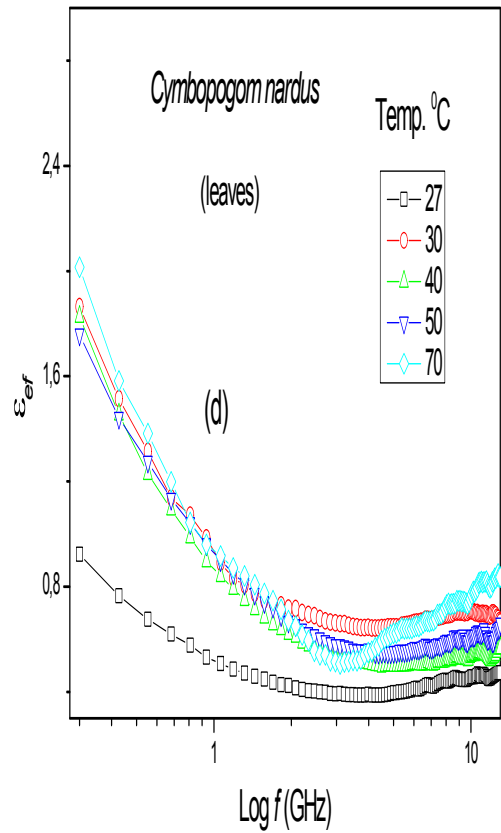

Figure S7. (a) – (d) Dielectric loss factor of the plant/water mixtures samples with 1:1 mass ratio as function of frequency and temperature.

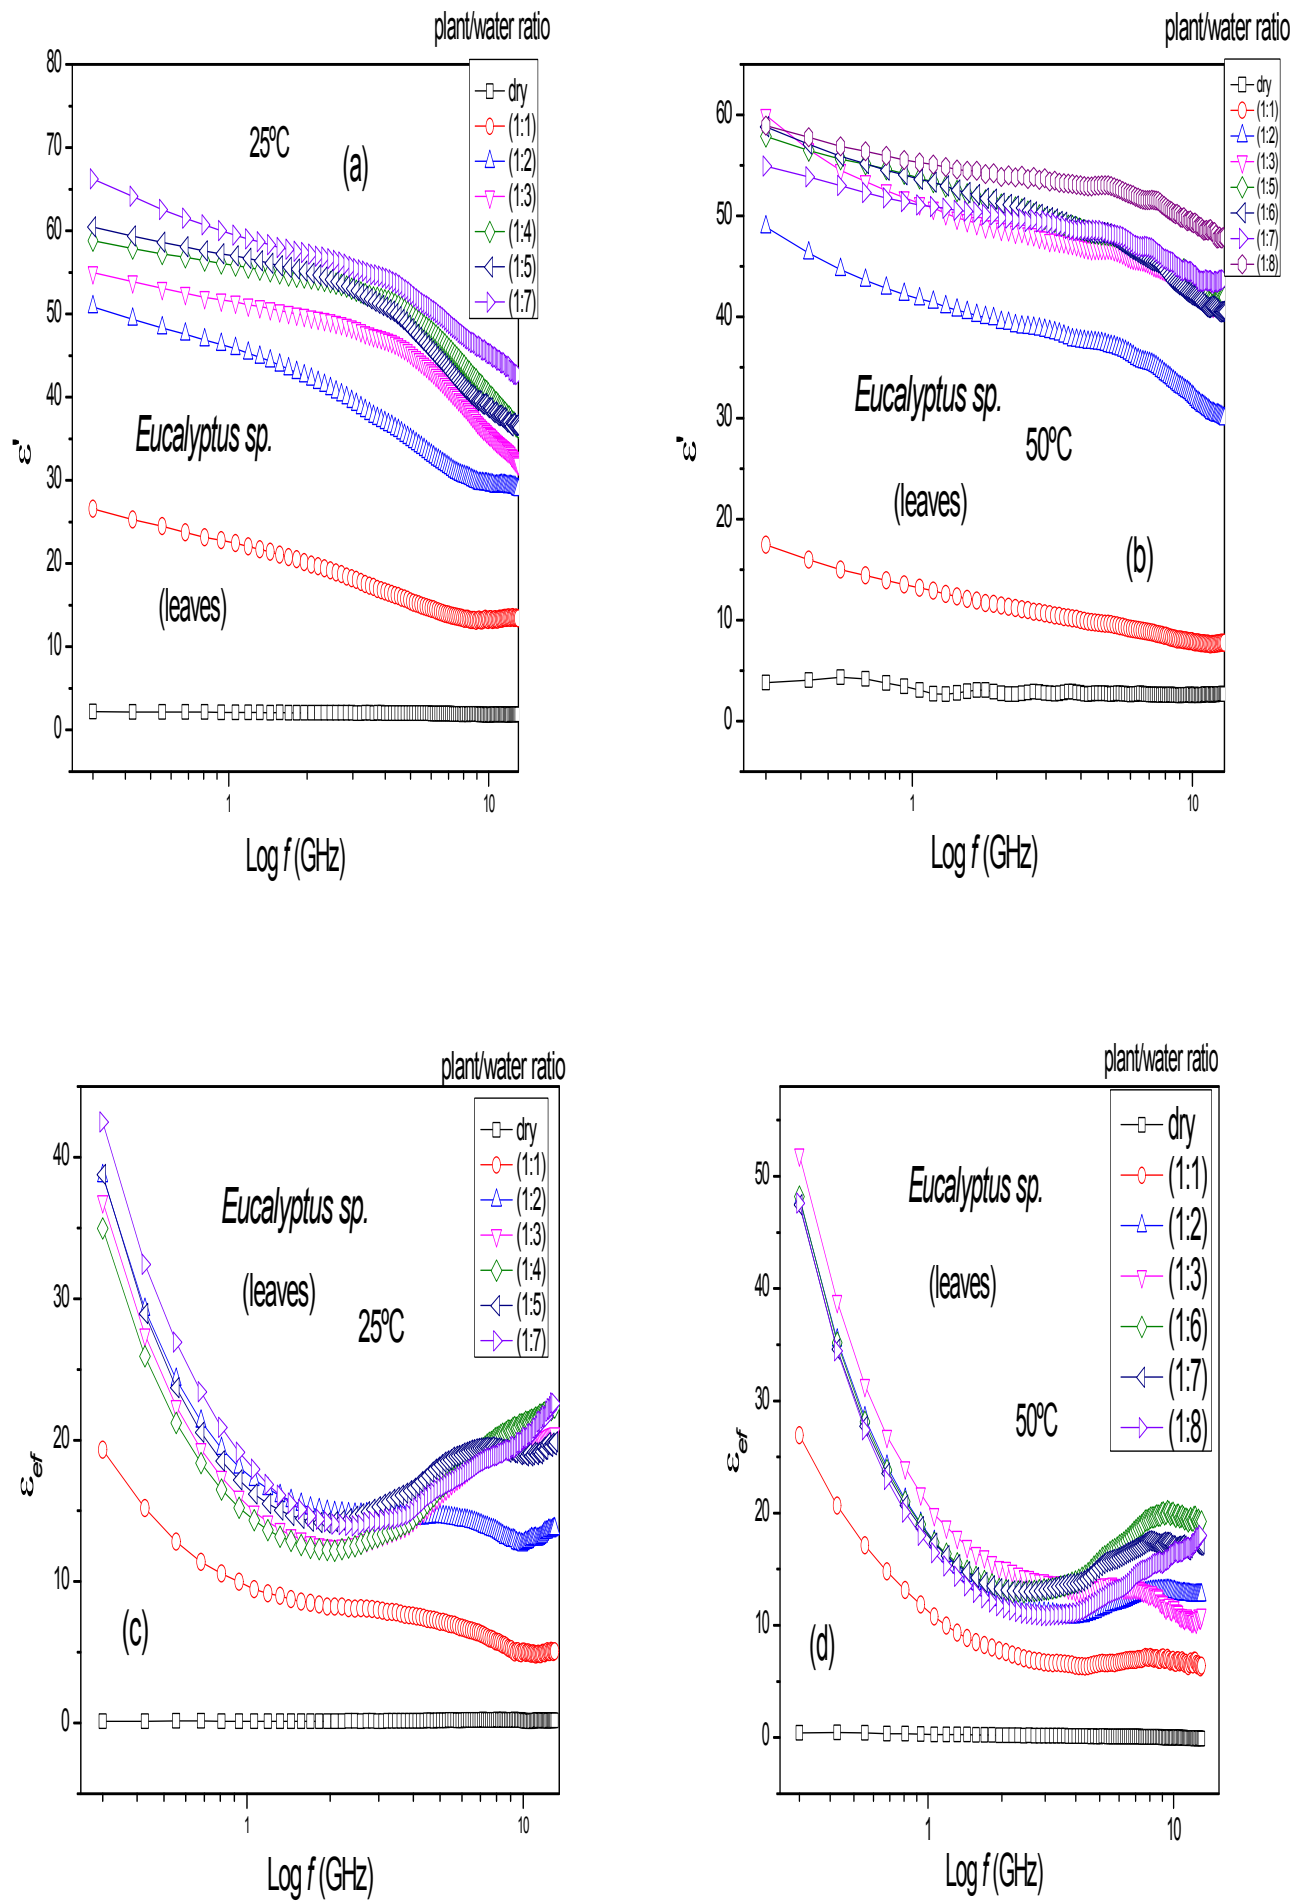

Figure S8. (a) – (b) Dielectric constant and (c) –(d) loss factor of the *Eucalyptus sp.*/water mixtures at different plant/water mass ratio and at two different temperatures as function of frequency. For comparison the results for dry plant are shown too.

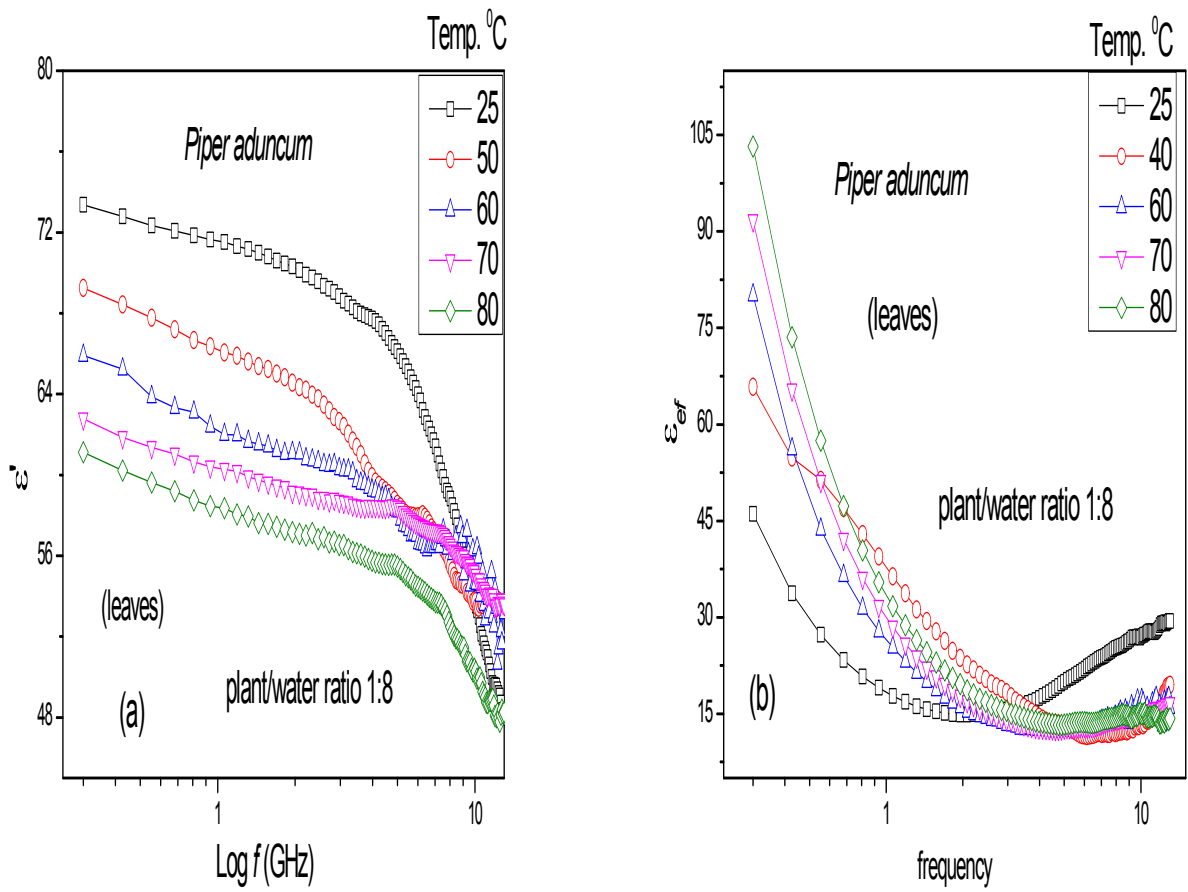

Figure S9. (a) Dielectric constant and (b) loss factor of the *Piper aduncum* /water mixtures at 1:8 plant/water mass ratio, as function of temperatures and frequency.



Table S1

| Plant                                       | 0.915 GHz |             |                 |             |         | 2.45 GHz    |                 |             |         |
|---------------------------------------------|-----------|-------------|-----------------|-------------|---------|-------------|-----------------|-------------|---------|
|                                             | T (°C)    | $\epsilon'$ | $\epsilon_{ef}$ | Tg $\delta$ | Dp (cm) | $\epsilon'$ | $\epsilon_{ef}$ | Tg $\delta$ | Dp (cm) |
| <i>Eucalyptus</i><br><i>sp.</i> (leaves)    | 27        | 1.519       | 0.042           | 0.027       | 30.53   | 1.491       | 0.038           | 0.026       | 12.33   |
|                                             | 35        | 1.547       | 0.043           | 0.027       | 30.12   | 1.519       | 0.046           | 0.030       | 10.45   |
|                                             | 40        | 1.606       | 0.058           | 0.036       | 22.83   | 1.578       | 0.053           | 0.033       | 9.25    |
|                                             | 50        | 1.643       | 0.086           | 0.052       | 15.61   | 1.602       | 0.063           | 0.039       | 7.86    |
|                                             | 70        | 1.661       | 0.068           | 0.040       | 19.85   | 1.611       | 0.057           | 0.035       | 8.63    |
| <i>P. Aduncum</i><br>(leaves)               | 30        | 1.568       | 0.063           | 0.040       | 20.73   | 1.531       | 0.056           | 0.036       | 8.61    |
|                                             | 35        | 1.611       | 0.071           | 0.044       | 18.63   | 1.565       | 0.067           | 0.043       | 7.20    |
|                                             | 40        | 1.645       | 0.089           | 0.054       | 14.91   | 1.593       | 0.079           | 0.050       | 6.18    |
|                                             | 50        | 1.588       | 0.086           | 0.054       | 15.18   | 1.538       | 0.077           | 0.050       | 6.27    |
|                                             | 60        | 1.547       | 0.074           | 0.048       | 17.45   | 1.498       | 0.065           | 0.044       | 7.26    |
|                                             | 70        | 1.588       | 0.094           | 0.059       | 13.89   | 1.531       | 0.077           | 0.051       | 6.20    |
| <i>P. Aduncum</i><br>(stalk)                | 26        | 1.606       | 0.088           | 0.055       | 15.0    | 1.557       | 0.077           | 0.050       | 6.26    |
|                                             | 35        | 1.601       | 0.101           | 0.063       | 12.97   | 1.544       | 0.089           | 0.058       | 5.39    |
|                                             | 40        | 1.599       | 0.097           | 0.061       | 13.57   | 1.541       | 0.085           | 0.055       | 5.68    |
|                                             | 60        | 1.612       | 0.115           | 0.071       | 11.51   | 1.551       | 0.089           | 0.057       | 5.41    |
|                                             | 70        | 1.582       | 0.105           | 0.066       | 12.44   | 1.522       | 0.076           | 0.050       | 6.28    |
| <i>P. hispid.</i><br>(leaves)               | 30        | 1.825       | 0.095           | 0.052       | 14.77   | 1.768       | 0.088           | 0.050       | 5.84    |
|                                             | 35        | 1.7355      | 0.087           | 0.050       | 15.77   | 1.682       | 0.082           | 0.049       | 6.12    |
|                                             | 40        | 1.7439      | 0.084           | 0.048       | 16.35   | 1.699       | 0.077           | 0.045       | 6.59    |
|                                             | 50        | 1.7017      | 0.099           | 0.058       | 13.75   | 1.643       | 0.086           | 0.052       | 5.78    |
|                                             | 60        | 1.813       | 0.104           | 0.057       | 13.42   | 1.746       | 0.102           | 0.058       | 5.02    |
|                                             | 70        | 1.818       | 0.100           | 0.055       | 14.01   | 1.743       | 0.085           | 0.049       | 6.03    |
| <i>P. hispid.</i><br>(stalk)                | 27        | 1.372       | 0.055           | 0.040       | 22.02   | 1.326       | 0.054           | 0.041       | 8.24    |
|                                             | 35        | 1.558       | 0.0856          | 0.055       | 15.20   | 1.509       | 0.074           | 0.049       | 6.43    |
|                                             | 50        | 1.574       | 0.109           | 0.069       | 11.93   | 1.521       | 0.088           | 0.058       | 5.43    |
|                                             | 60        | 1.591       | 0.097           | 0.061       | 13.49   | 1.544       | 0.078           | 0.051       | 6.15    |
|                                             | 70        | 1.603       | 0.087           | 0.054       | 15.15   | 1.551       | 0.076           | 0.049       | 6.38    |
| <i>Cymbop.</i><br><i>nardus</i><br>(leaves) | 29        | 1.433       | 0.054           | 0.038       | 22.86   | 1.403       | 0.053           | 0.038       | 8.68    |
|                                             | 35        | 1.549       | 0.065           | 0.042       | 19.79   | 1.508       | 0.059           | 0.039       | 8.01    |
|                                             | 40        | 1.472       | 0.069           | 0.047       | 18.25   | 1.437       | 0.062           | 0.043       | 7.49    |
|                                             | 50        | 1.555       | 0.090           | 0.058       | 14.37   | 1.495       | 0.079           | 0.053       | 5.98    |
|                                             | 60        | 1.598       | 0.101           | 0.063       | 13.04   | 1.540       | 0.096           | 0.062       | 5.01    |
| 70                                          | 1.539     | 0.102       | 0.066           | 12.69       | 1.476   | 0.088       | 0.060           | 5.35        |         |

Table S1. Dielectric properties of dry plants at various temperature at 0.915 GHz and 2.45GHz.

Table S2

| Plant                                       | 0.915 GHz |             |                 |             |         | 2.45 GHz    |                 |             |         |
|---------------------------------------------|-----------|-------------|-----------------|-------------|---------|-------------|-----------------|-------------|---------|
|                                             | T (°C)    | $\epsilon'$ | $\epsilon_{ef}$ | Tg $\delta$ | Dp (cm) | $\epsilon'$ | $\epsilon_{ef}$ | Tg $\delta$ | Dp (cm) |
| <i>Eucalyptus</i><br><i>sp.</i> (leaves)    | 24        | 3.556       | 0.560           | 0.157       | 3.52    | 3.373       | 0.426           | 0.126       | 1.68    |
|                                             | 30        | 7.331       | 2.078           | 0.283       | 1.37    | 6.874       | 1.287           | 0.187       | 0.79    |
|                                             | 40        | 7.994       | 2.014           | 0.252       | 1.47    | 7.544       | 1.188           | 0.157       | 0.90    |
|                                             | 50        | 9.223       | 3.299           | 0.357       | 0.97    | 8.503       | 1.840           | 0.216       | 0.62    |
|                                             | 60        | 9.186       | 4.383           | 0.477       | 0.74    | 8.348       | 2.374           | 0.284       | 0.48    |
|                                             | 70        | 9.898       | 5.919           | 0.598       | 0.57    | 9.285       | 2.986           | 0.321       | 0.40    |
| <i>P. Aduncum</i><br>(leaves)               | 23        | 5.258       | 1.668           | 0.317       | 1.45    | 4.746       | 1.206           | 0.254       | 0.71    |
|                                             | 30        | 6.923       | 2.322           | 0.335       | 1.19    | 6.369       | 1.594           | 0.250       | 0.62    |
|                                             | 40        | 6.060       | 2.042           | 0.337       | 1.27    | 5.535       | 1.236           | 0.223       | 0.74    |
|                                             | 50        | 8.028       | 3.213           | 0.400       | 0.94    | 7.264       | 1.794           | 0.247       | 0.59    |
|                                             | 60        | 7.208       | 3.617           | 0.501       | 0.79    | 6.592       | 1.895           | 0.287       | 0.53    |
|                                             | 70        | 8.827       | 5.012           | 0.567       | 0.64    | 7.778       | 2.508           | 0.322       | 0.44    |
| <i>P. Aduncum</i><br>(stalk)                | 30        | 5.277       | 1.304           | 0.247       | 1.85    | 4.981       | 0.859           | 0.172       | 1.01    |
|                                             | 40        | 5.972       | 1.585           | 0.265       | 1.62    | 5.700       | 0.942           | 0.165       | 0.98    |
|                                             | 50        | 6.925       | 2.346           | 0.338       | 1.18    | 6.512       | 1.371           | 0.210       | 0.73    |
|                                             | 60        | 7.180       | 2.964           | 0.413       | 0.96    | 6.504       | 1.566           | 0.241       | 0.64    |
|                                             | 70        | 8.327       | 2.642           | 0.317       | 1.15    | 7.648       | 1.413           | 0.185       | 0.76    |
| <i>P. hispid.</i><br>(leaves)               | 28        | 5.235       | 1.728           | 0.330       | 1.40    | 4.765       | 1.151           | 0.241       | 0.74    |
|                                             | 30        | 5.375       | 1.656           | 0.308       | 1.47    | 4.936       | 1.094           | 0.221       | 0.79    |
|                                             | 40        | 11.447      | 7.313           | 0.639       | 0.50    | 10.755      | 4.086           | 0.380       | 0.32    |
|                                             | 50        | 11.643      | 7.973           | 0.685       | 0.47    | 10.901      | 4.012           | 0.368       | 0.32    |
|                                             | 60        | 12.849      | 10.442          | 0.813       | 0.38    | 12.229      | 5.189           | 0.424       | 0.27    |
|                                             | 70        | 11.051      | 12.373          | 1.119       | 0.31    | 11.271      | 5.910           | 0.524       | 0.22    |
| <i>P. hispid.</i><br>(stalk)                | 26        | 10.427      | 3.272           | 0.314       | 1.04    | 9.948       | 2.296           | 0.231       | 0.54    |
|                                             | 30        | 8.820       | 2.887           | 0.327       | 1.08    | 8.222       | 1.965           | 0.239       | 0.57    |
|                                             | 50        | 6.284       | 1.870           | 0.297       | 1.41    | 5.842       | 1.072           | 0.183       | 0.88    |
|                                             | 60        | 5.106       | 0.990           | 0.194       | 2.39    | 4.885       | 0.606           | 0.124       | 1.42    |
|                                             | 70        | 6.248       | 0.284           | 0.045       | 9.17    | 6.054       | 0.354           | 0.058       | 2.70    |
| <i>Cymbop.</i><br><i>nardus</i><br>(leaves) | 27        | 2.738       | 0.538           | 0.196       | 3.21    | 2.527       | 0.403           | 0.159       | 1.54    |
|                                             | 30        | 3.605       | 0.999           | 0.277       | 2.00    | 3.301       | 0.689           | 0.209       | 1.03    |
|                                             | 40        | 3.176       | 0.911           | 0.287       | 2.06    | 2.904       | 0.568           | 0.196       | 1.17    |
|                                             | 50        | 3.852       | 0.973           | 0.252       | 2.12    | 3.521       | 0.615           | 0.175       | 1.19    |
|                                             | 70        | 6.701       | 0.973           | 0.145       | 2.78    | 6.383       | 0.558           | 0.087       | 1.76    |

Table S2. Dielectric behavior of plants with addition of water (1:1) as function of temperature at 0.915 GHz and 2.45GHz.

Table S3

| Plant                         | 0.915 GHz |             |                 |             |         | 2.45 GHz    |                 |             |         |
|-------------------------------|-----------|-------------|-----------------|-------------|---------|-------------|-----------------|-------------|---------|
|                               | T (°C)    | $\epsilon'$ | $\epsilon_{ef}$ | Tg $\delta$ | Dp (cm) | $\epsilon'$ | $\epsilon_{ef}$ | Tg $\delta$ | Dp (cm) |
| <i>P. Aduncum</i><br>(leaves) | 25        | 71.669      | 19.308          | 0.269       | 4.61    | 69.587      | 15.057          | 0.216       | 2.17    |
|                               | 30        | 42.445      | 33.247          | 0.783       | 2.17    | 51.350      | 16.047          | 0.312       | 1.76    |
|                               | 40        | 44.519      | 39.971          | 0.898       | 1.88    | 55.024      | 20.401          | 0.371       | 1.43    |
|                               | 50        | 66.414      | 28.357          | 0.427       | 3.06    | 63.792      | 17.248          | 0.270       | 1.82    |
|                               | 60        | 62.521      | 28.387          | 0.454       | 2.97    | 60.661      | 14.418          | 0.238       | 2.12    |
|                               | 70        | 60.437      | 32.398          | 0.536       | 2.58    | 58.850      | 15.394          | 0.262       | 1.96    |
|                               | 80        | 58.508      | 36.224          | 0.619       | 2.29    | 56.832      | 16.880          | 0.297       | 1.76    |
|                               | 90        | 34.977      | 51.116          | 1.461       | 1.42    | 49.824      | 24.240          | 0.486       | 1.16    |

Table S3. Dielectric parameters of *Piper aduncum* with water (1:8) as function of temperature at 0.915 GHz and 2.45GHz.

Table S4

| Plant/<br>water<br>ratio | 915 MHz |             |              |             |         | 2.45 GHz    |              |             |         |
|--------------------------|---------|-------------|--------------|-------------|---------|-------------|--------------|-------------|---------|
|                          | T (°C)  | $\epsilon'$ | $\epsilon''$ | Tg $\delta$ | Dp (mm) | $\epsilon'$ | $\epsilon''$ | Tg $\delta$ | Dp (mm) |
| Dry plant                | 25      | 2.138       | 0.119        | 0.056       | 127.752 | 2.063       | 0.140        | 0.068       | 40.091  |
|                          | 50      | 2.109       | 0.331        | 0.157       | 45.961  | 1.959       | 0.175        | 0.089       | 31.192  |
|                          | 70      | 1.890       | 0.157        | 0.083       | 91.654  | 1.847       | 0.072        | 0.039       | 73.341  |
|                          | 80      | 3.484       | 1.107        | 0.318       | 17.798  | 2.736       | 0.759        | 0.277       | 8.572   |
| (1:1)                    | 25      | 22.842      | 10.060       | 0.440       | 5.068   | 19.169      | 8.075        | 0.421       | 2.156   |
|                          | 50      | 22.911      | 12.061       | 0.526       | 4.271   | 20.560      | 7.061        | 0.343       | 2.537   |
|                          | 70      | 17.541      | 9.464        | 0.540       | 4.770   | 15.772      | 5.575        | 0.354       | 2.816   |
|                          | 80      | 13.581      | 8.479        | 0.624       | 4.731   | 11.073      | 5.082        | 0.459       | 2.613   |
| (1:2)                    | 25      | 46.407      | 18.287       | 0.394       | 3.957   | 41.034      | 14.742       | 0.359       | 1.719   |
|                          | 50      | 42.543      | 19.42        | 0.457       | 3.588   | 39.949      | 11.350       | 0.284       | 2.19    |
|                          | 70      | 35.739      | 20.380       | 0.570       | 3.173   | 32.472      | 11.129       | 0.343       | 2.023   |
|                          | 80      | 42.327      | 25.264       | 0.597       | 2.794   | 39.000      | 13.194       | 0.338       | 1.869   |
| (1:3)                    | 25      | 51.746      | 16.185       | 0.313       | 4.690   | 49.214      | 12.605       | 0.256       | 2.185   |
|                          | 50      | 47.521      | 22.092       | 0.465       | 3.337   | 43.037      | 14.354       | 0.333       | 1.804   |
|                          | 70      | 43.173      | 20.070       | 0.465       | 3.501   | 40.877      | 11.740       | 0.287       | 2.142   |
|                          | 80      | 51.917      | 31.048       | 0.598       | 2.518   | 48.489      | 15.758       | 0.325       | 1.7432  |
| (1:4)                    | 25      | 56.145      | 15.424       | 0.275       | 5.113   | 53.853      | 12.495       | 0.232       | 2.303   |
|                          | 50      | 52.916      | 18.896       | 0.357       | 4.076   | 51.024      | 11.521       | 0.226       | 2.430   |
|                          | 70      | 49.306      | 23.677       | 0.480       | 3.176   | 47.236      | 12.986       | 0.275       | 2.080   |
|                          | 80      | 5.018       | 0.602        | 0.120       | 3.887   | 4.935       | 0.396        | 0.080       | 2.185   |
| (1:5)                    | 25      | 57.295      | 17.376       | 0.303       | 4.594   | 54.163      | 14.578       | 0.269       | 1.984   |
|                          | 50      | 19.845      | 1.215        | 0.061       | 3.824   | 18.794      | 2.668        | 0.142       | 6.345   |
|                          | 70      | 49.150      | 22.481       | 0.457       | 3.332   | 47.030      | 12.596       | 0.268       | 2.139   |
|                          | 80      | 54.272      | 25.945       | 0.478       | 3.040   | 50.639      | 14.422       | 0.285       | 1.941   |
| (1:6)                    | 25      | -----       | -----        | -----       | -----   | -----       | -----        | -----       | -----   |
|                          | 50      | 58.911      | 17.615       | 0.299       | 4.594   | 57.279      | 12.951       | 0.226       | 2.290   |
|                          | 70      | 13.203      | 6.860        | 0.52        | 5.522   | 13.122      | 12.07        | 0.92        | 1.169   |
|                          | 80      | 53.702      | 24.360       | 0.454       | 3.213   | 50.813      | 15.267       | 0.300       | 1.839   |
| (1:7)                    | 25      | 60.096      | 19.426       | 0.323       | 4.214   | 56.652      | 13.939       | 0.246       | 2.119   |
|                          | 50      | 61.497      | 19.078       | 0.310       | 4.337   | 59.413      | 13.019       | 0.219       | 2.320   |
|                          | 70      | 65.748      | 22.555       | 0.343       | 3.803   | 64.091      | 13.199       | 0.206       | 2.375   |
|                          | 80      | 51.451      | 19.210       | 0.373       | 3.959   | 49.659      | 10.500       | 0.211       | 2.628   |
| (1:8)                    | 25      | 30.842      | 15.177       | 0.492       | 3.924   | 34.733      | 2.874        | 0.083       | 7.995   |
|                          | 50      | 57.792      | 18.320       | 0.317       | 4.380   | 56.293      | 11.081       | 0.197       | 2.650   |
|                          | 70      | 54.342      | 22.505       | 0.414       | 3.486   | 52.929      | 11.842       | 0.224       | 2.408   |
|                          | 80      | 55.606      | 25.488       | 0.458       | 3.127   | 53.955      | 12.449       | 0.231       | 2.313   |

Table S4. Dielectric parameters of *Eucalyptus sp.* with water as function of temperature at 0.915 GHz and 2.45GHz at various plant/water ratio

## II. Diameters of the dielectric samples in cylindrical cavities

1. Dielectric properties of pure liquids, ethanol, methanol and glycerin as dielectric samples.

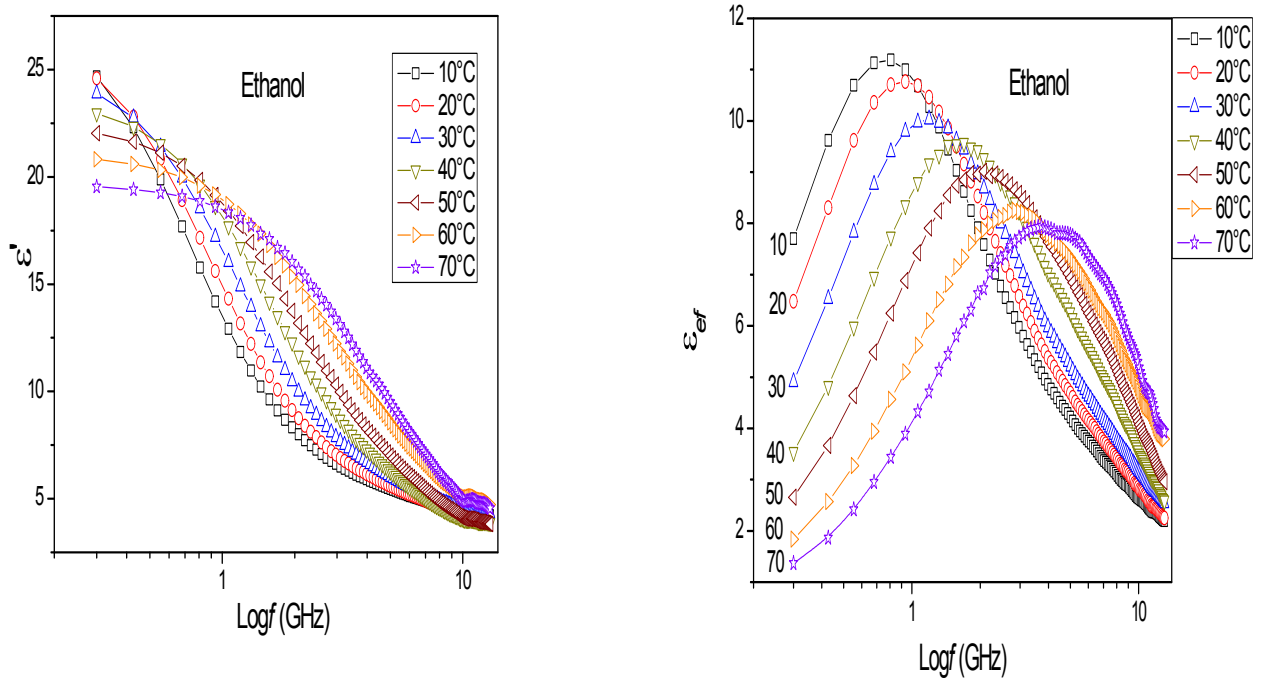

Figure S10. (a) Dielectric constant and (b) loss factor of ethanol as function of frequency and temperature.

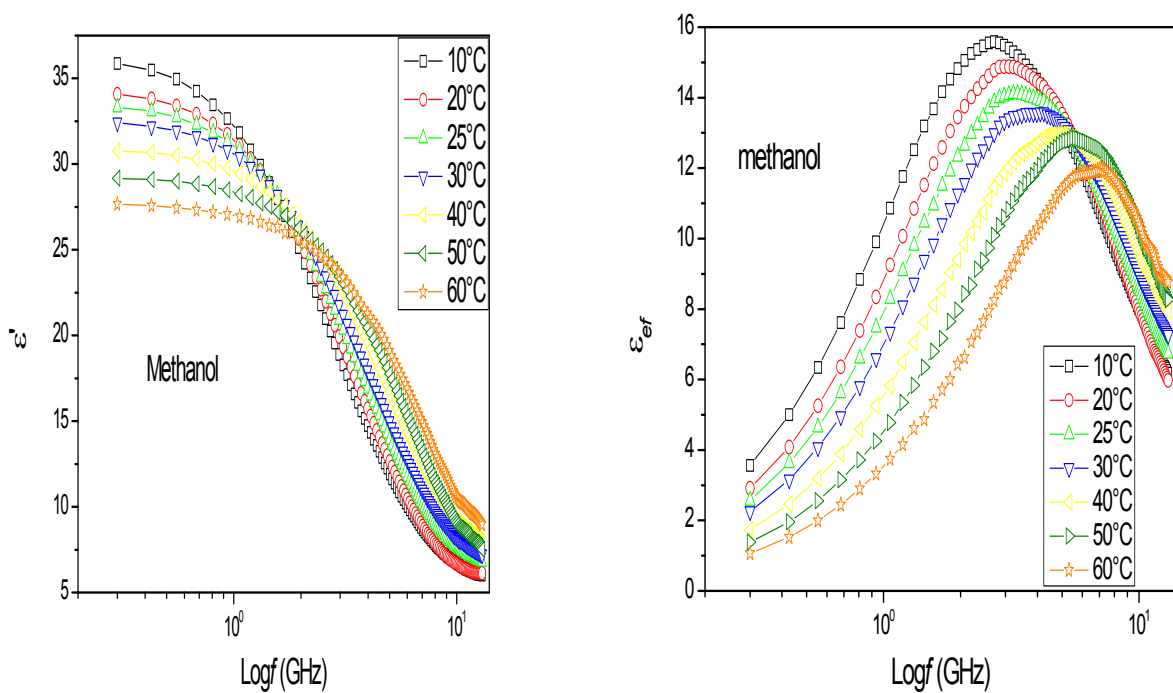

Figure 11. (a) Dielectric constant and (b) loss factor of methanol as function of frequency and temperature.

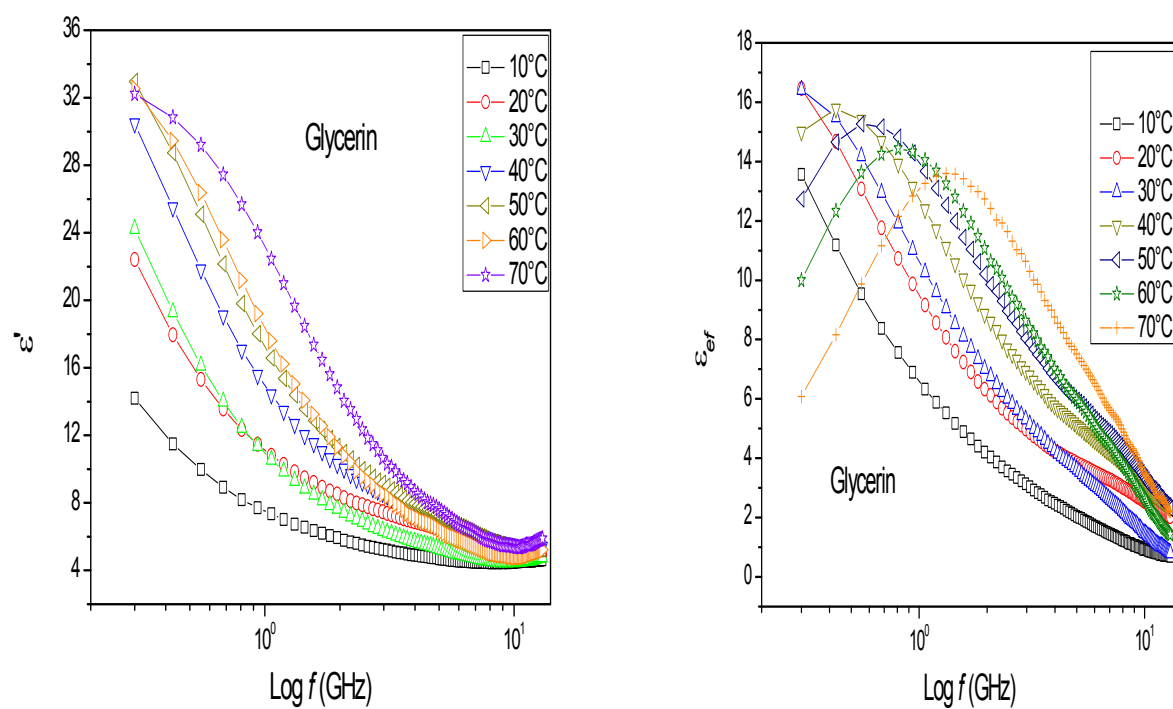

Figure S12. (a) Dielectric constant and (b) loss factor of glycerin as function of frequency and temperature.

2. Diameters of the dielectric samples in cylindrical cavities calculate from dielectric properties of pure liquids, ethanol, methanol and glycerin as dielectric samples.

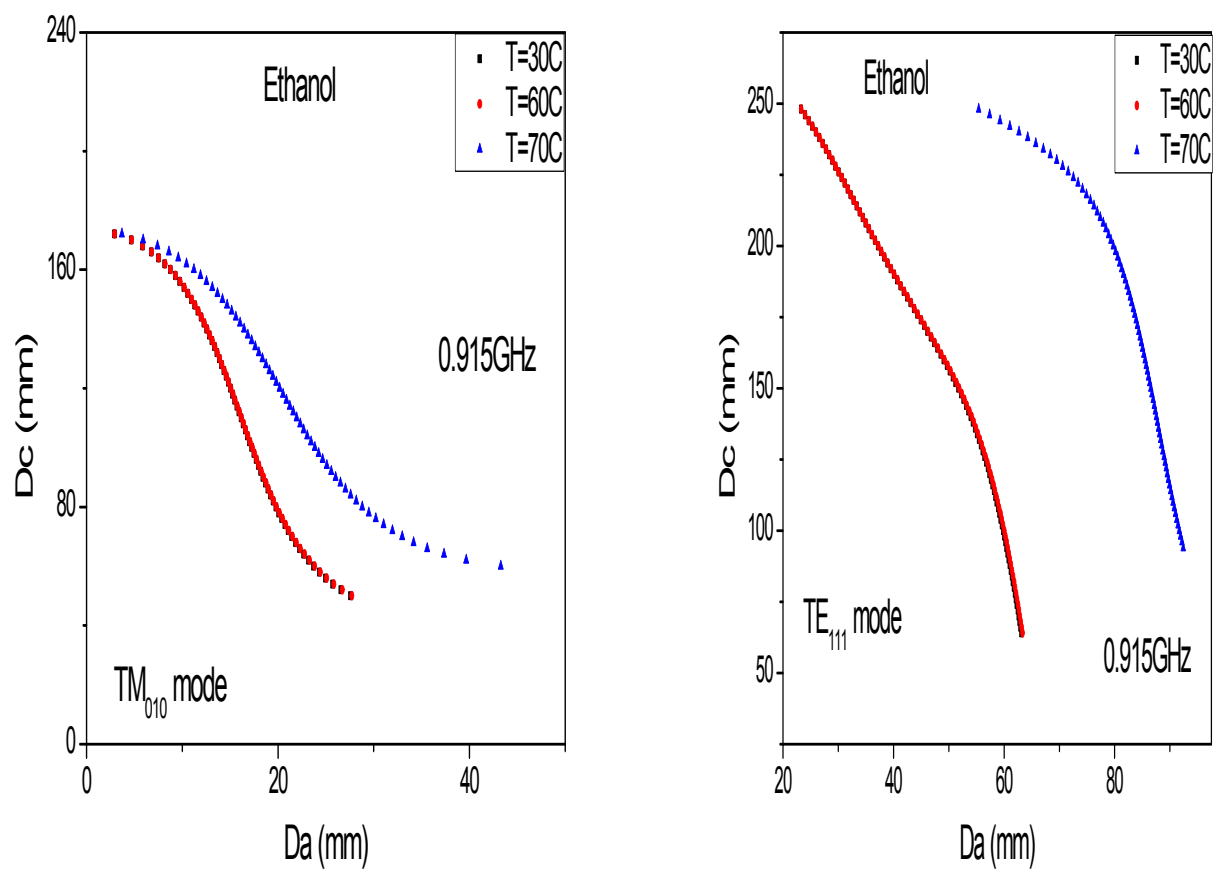

Figure S13. Internal diameter of a  $TM_{010}$  and  $TE_{111}$  cavities ( $D_c$ ) as a function of the diameter ( $D_a$ ) of dielectric for the pure ethanol at two different temperatures for 0.915 GHz.

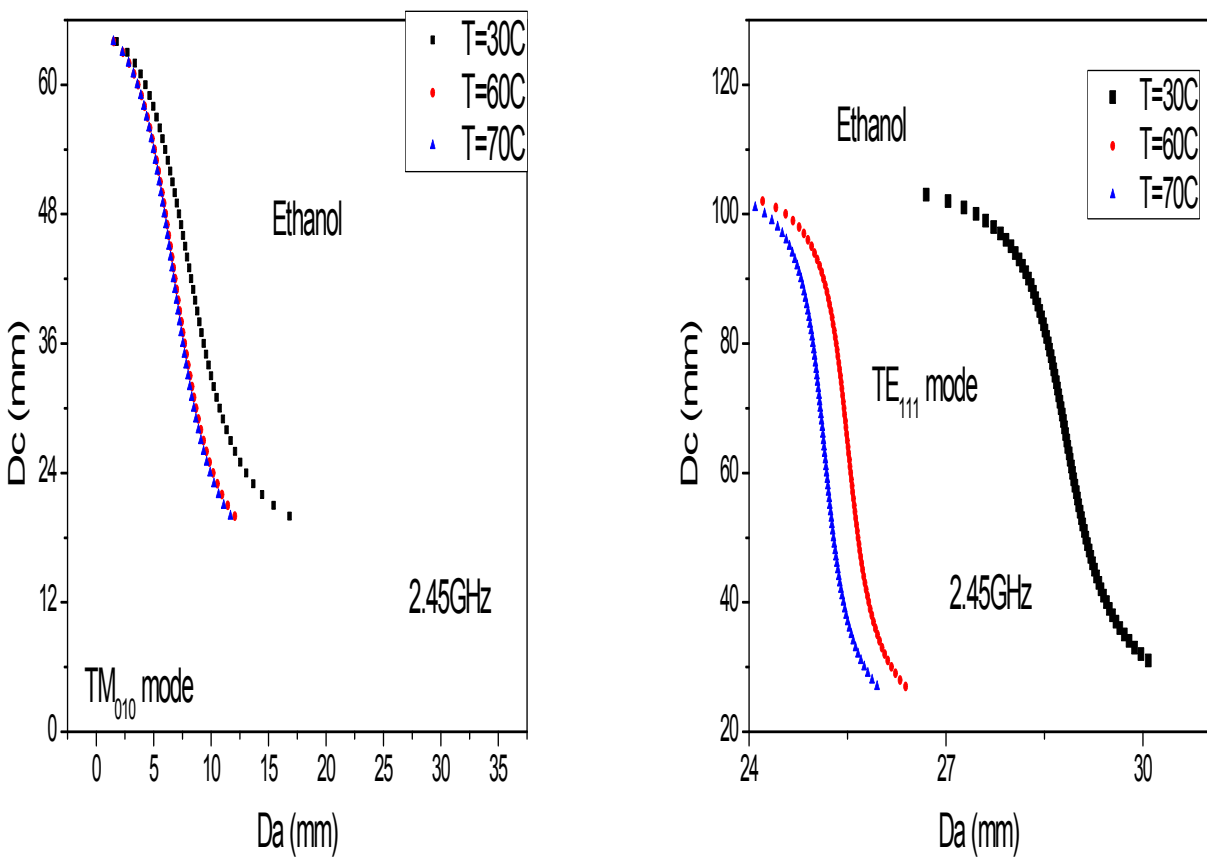

Figure S14. Internal diameter of a  $TM_{010}$  and  $TE_{111}$  cavities ( $D_c$ ) as a function of the diameter ( $D_a$ ) of dielectric for the pure ethanol at two different temperatures for 2.45 GHz.

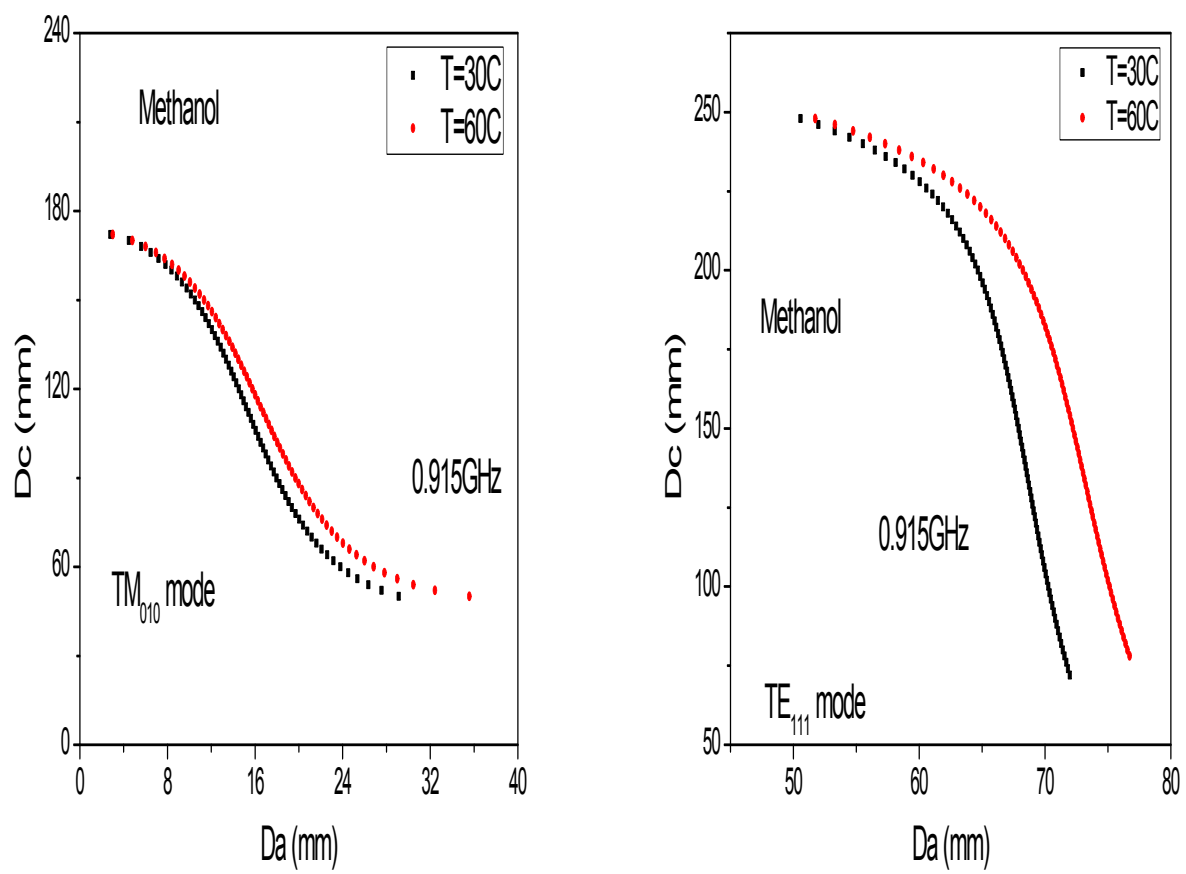

Figure S15. Internal diameter of a  $TM_{010}$  and  $TE_{111}$  cavities ( $D_c$ ) as a function of the diameter ( $D_a$ ) of dielectric for the pure methanol at two different temperatures for 0.915 GHz.



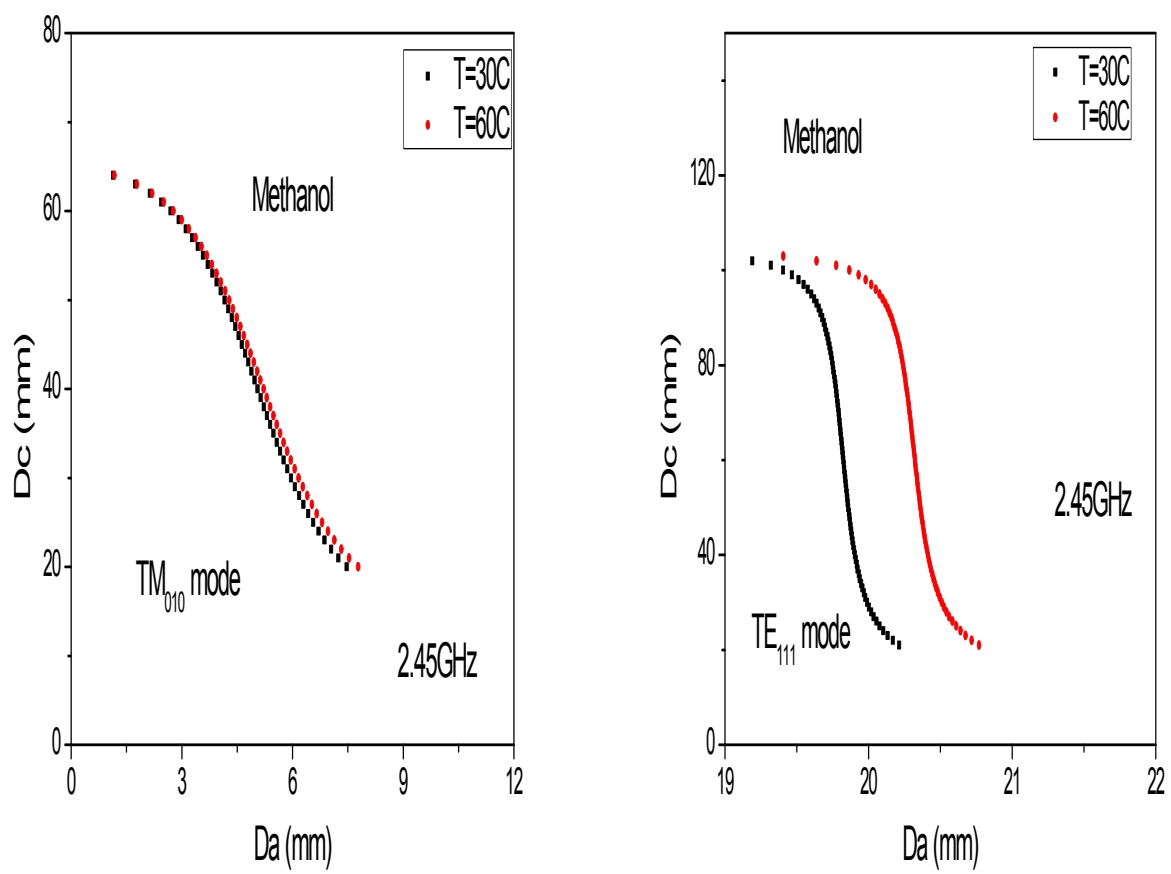

Figure S16. Internal diameter of a  $TM_{010}$  and  $TE_{111}$  cavities ( $D_c$ ) as a function of the diameter ( $D_a$ ) of dielectric for the pure methanol at two different temperatures for 2.45 GHz.

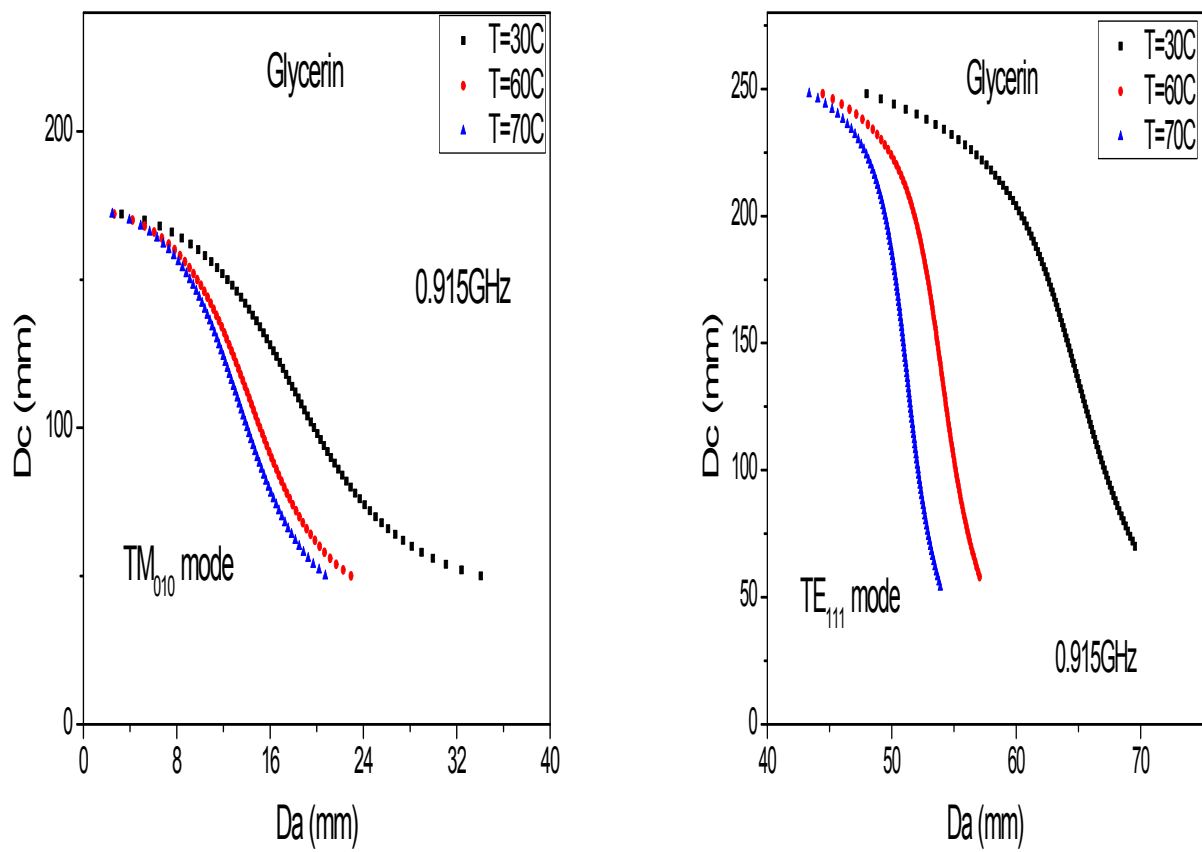

Figure S17. Internal diameter of a  $TM_{010}$  and  $TE_{111}$  cavities ( $D_c$ ) as a function of the diameter ( $D_a$ ) of dielectric for the pure glycerin at two different temperatures for 0.915 GHz.

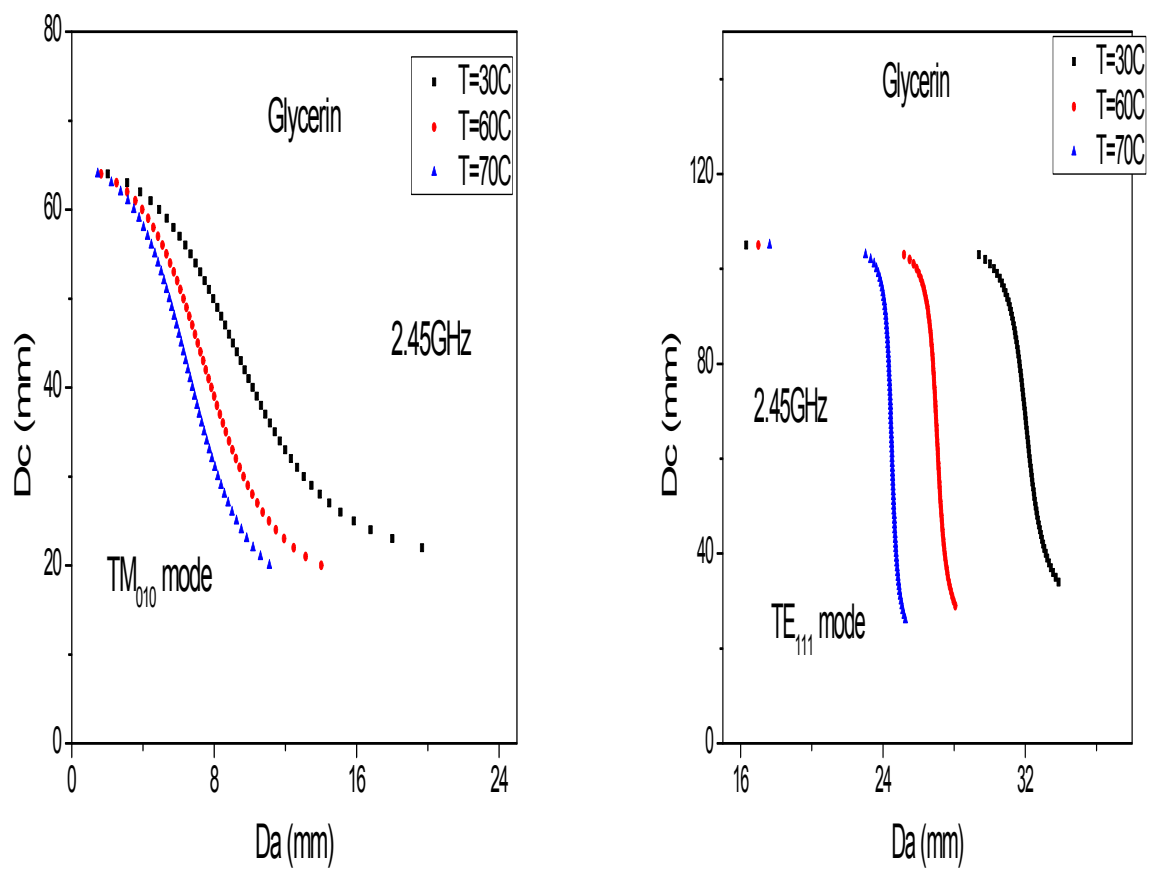

Figure S18. Internal diameter of a  $TM_{010}$  and  $TE_{111}$  cavities ( $D_c$ ) as a function of the diameter ( $D_a$ ) of dielectric for the pure glycerin at two different temperatures for 2.45 GHz.

3. Diameters of the dielectric samples in cylindrical cavities calculate from dielectric properties of plant/water mixtures as dielectric samples.

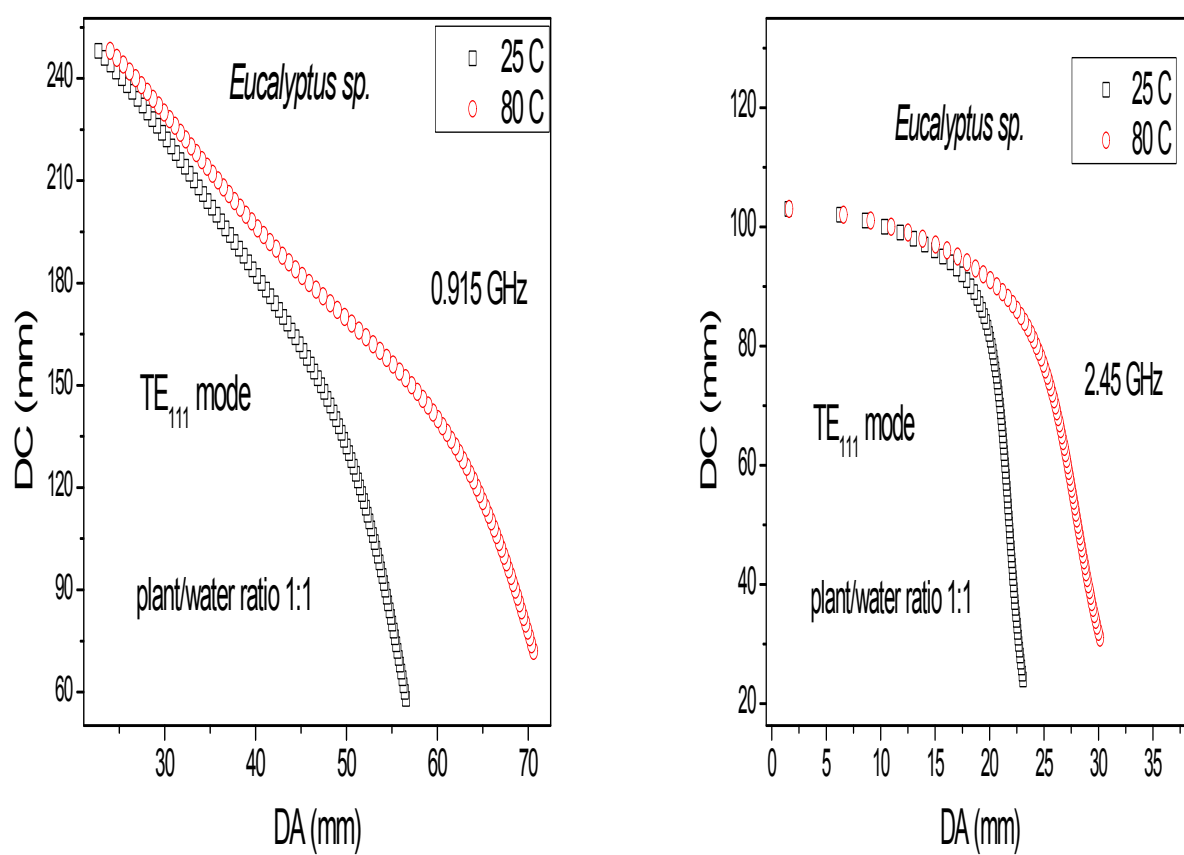

Figure S19. Internal diameter of a TE<sub>111</sub> cavity (Dc) as a function of the diameter (Da) of the dielectric for the *Eucalyptus sp.*/water mixtures with 1:1 plant/water mass ratio at two different temperatures for 0.915 GHz and 2.45 GHz

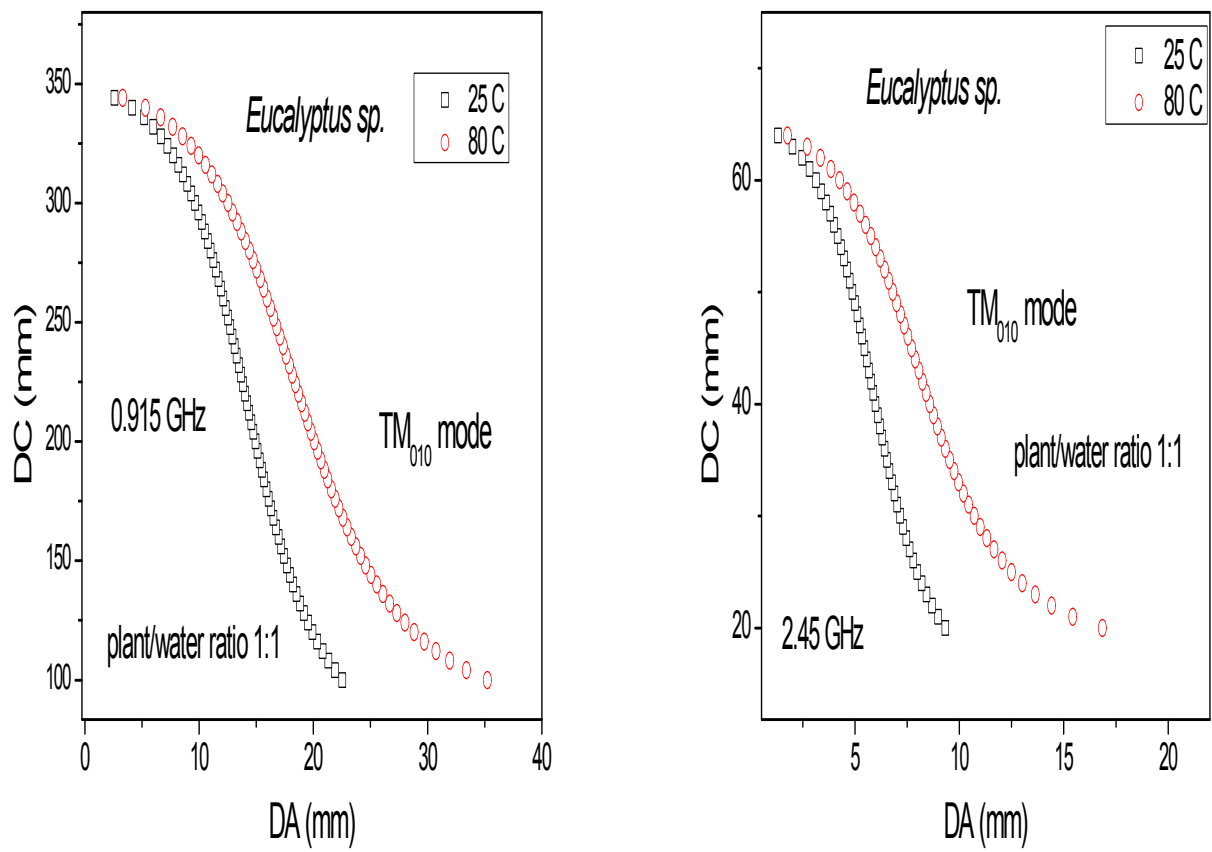

Figure S20. Internal diameter of a  $TM_{010}$  cavity ( $D_c$ ) as a function of the diameter ( $D_a$ ) of the dielectric for the *Eucalyptus sp.*/water mixtures with 1:1 plant/water mass ratio at two different temperatures for 0.915 GHz and 2.45 GHz

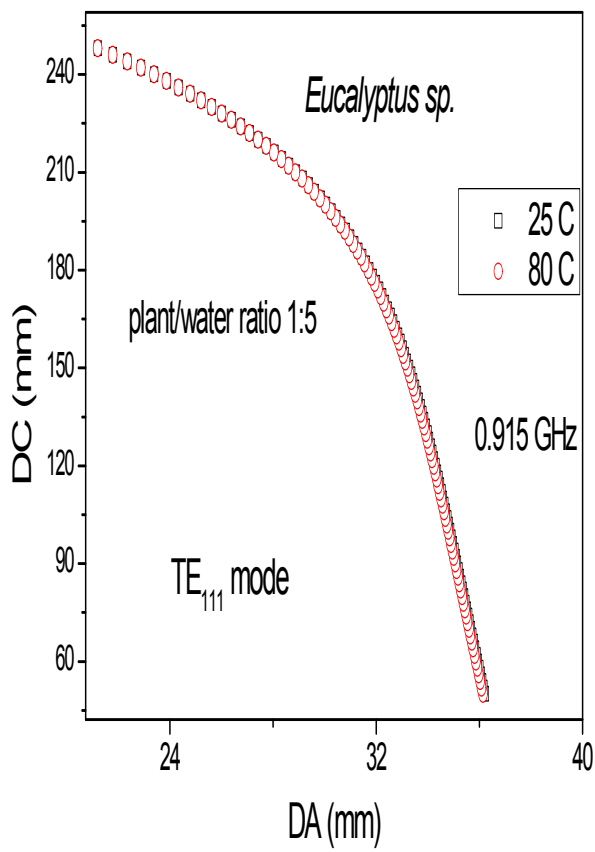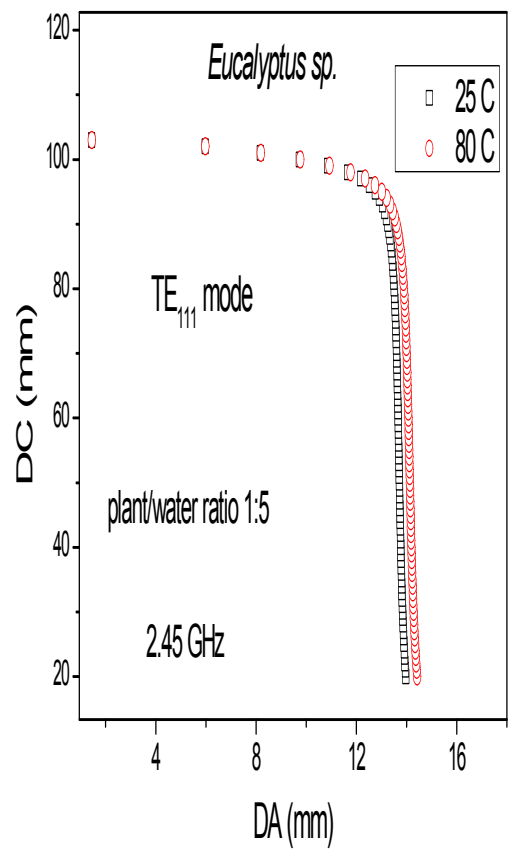

Figure S21. Internal diameter of a  $TE_{111}$  cavity ( $D_c$ ) as a function of the diameter ( $D_a$ ) of the dielectric for the *Eucalyptus sp.*/water mixtures with 1:5 plant/water mass ratio at two different temperatures for 0.915 GHz and 2.45 GHz

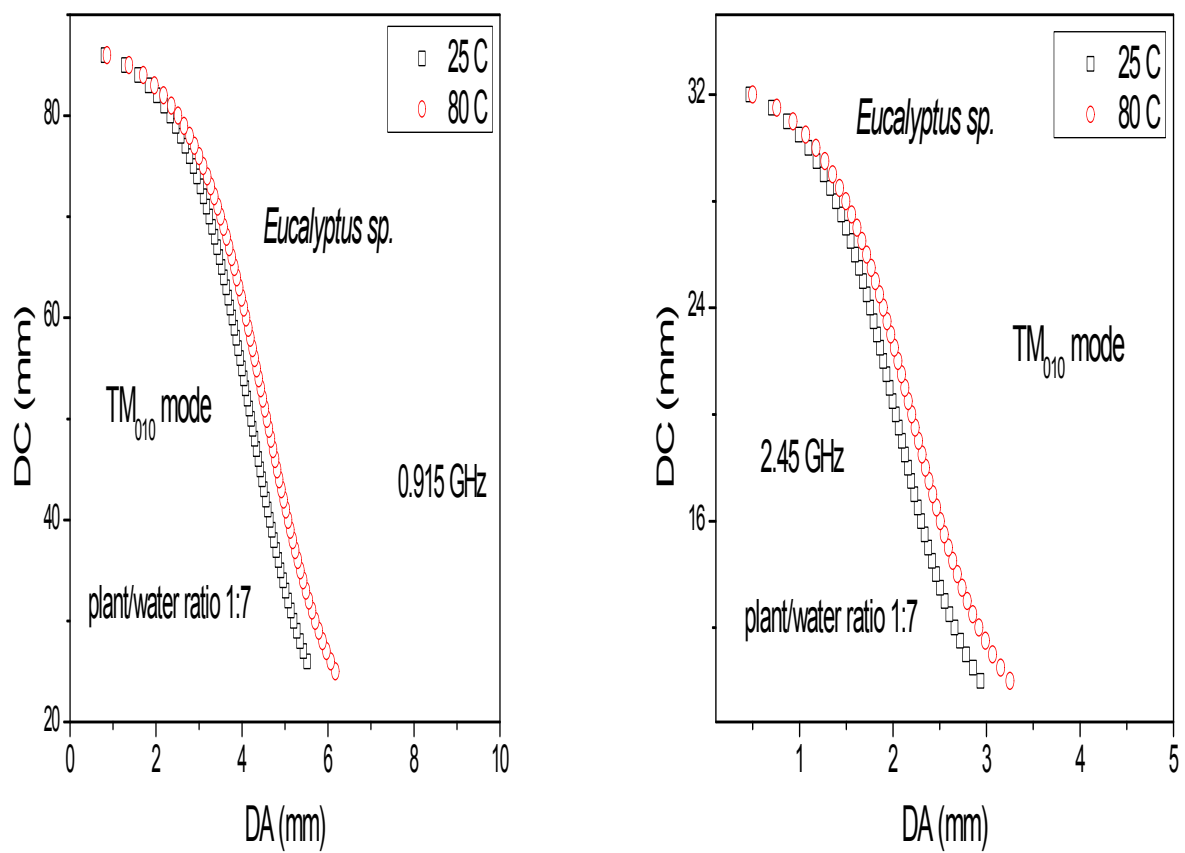

Figure S22. Internal diameter of a  $TM_{010}$  cavity ( $D_c$ ) as a function of the diameter ( $D_a$ ) of the dielectric for the *Eucalyptus* sp./water mixtures with 1:5 plant/water mass ratio at two different temperatures for 0.915 GHz and 2.45 GHz

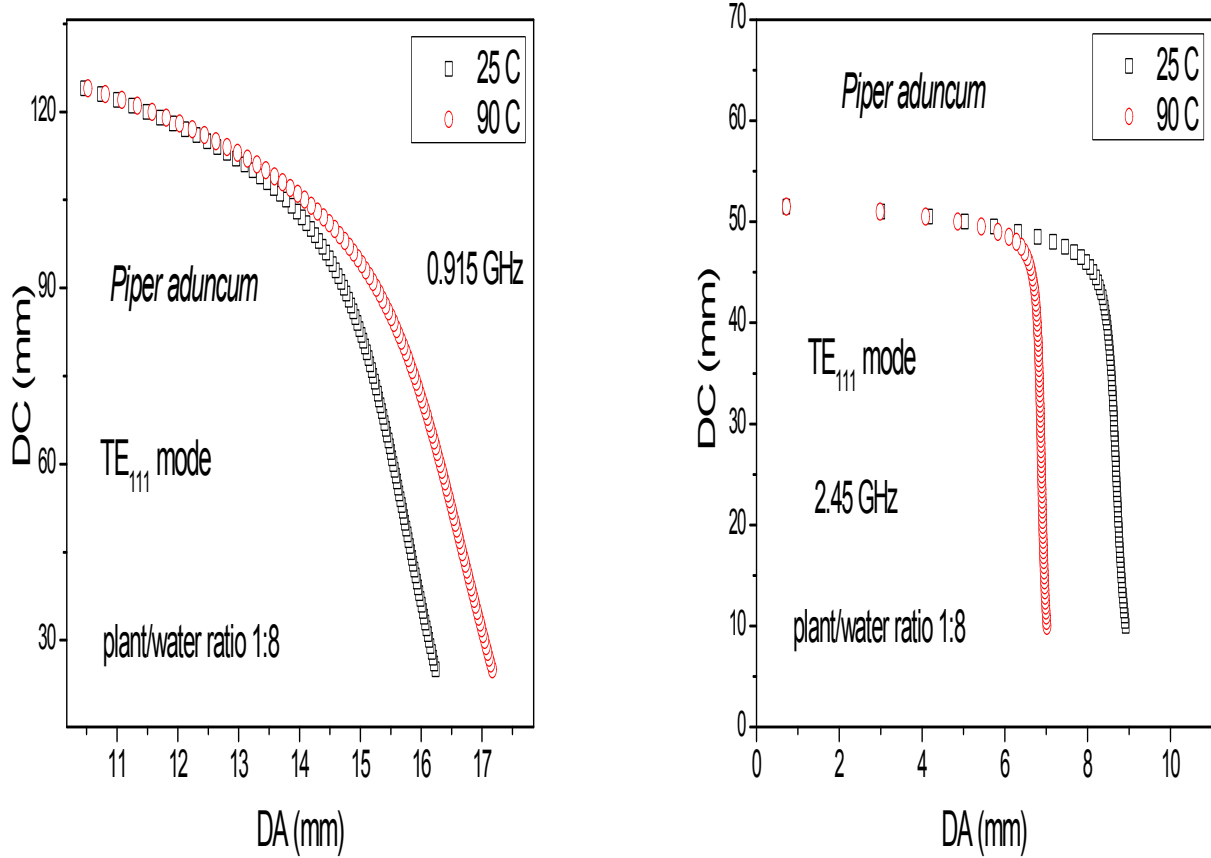

Figure S23. Internal diameter of a TE<sub>111</sub> cavity (D<sub>c</sub>) as a function of the diameter (D<sub>a</sub>) of the dielectric for the *Piper aduncum*/water mixtures with 1:8 plant/water mass ratio at two different temperatures for 0.915 GHz and 2.45 GHz.



### III. Chromatograms of the Essentials oils extracted by MAE

#### 1. Chromatograms of the experiments of table 1

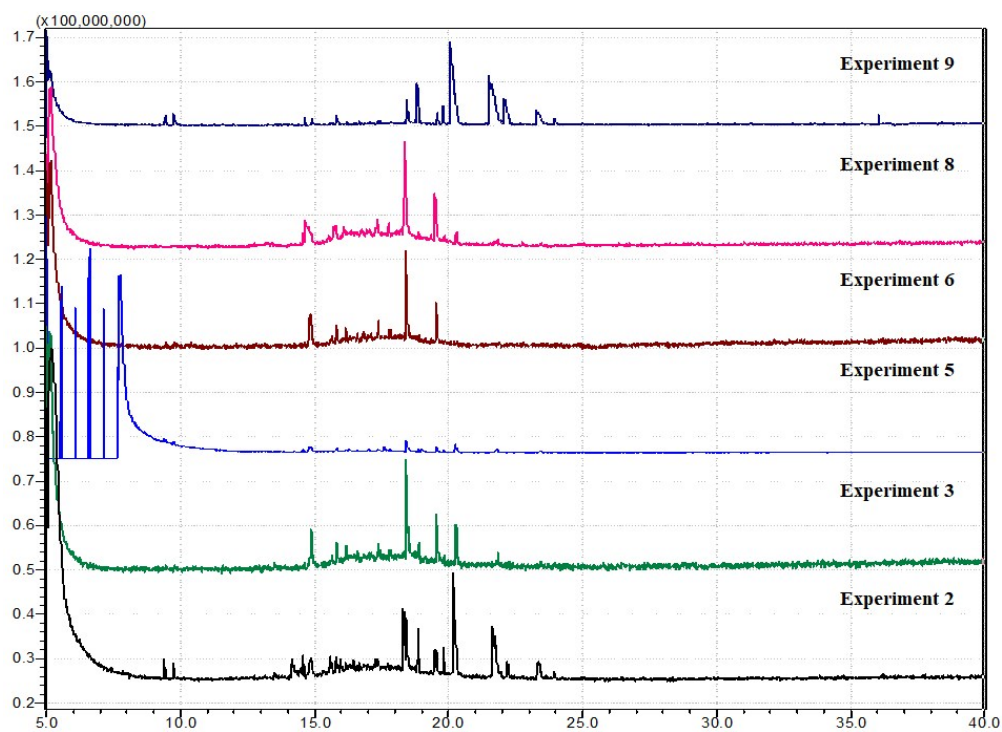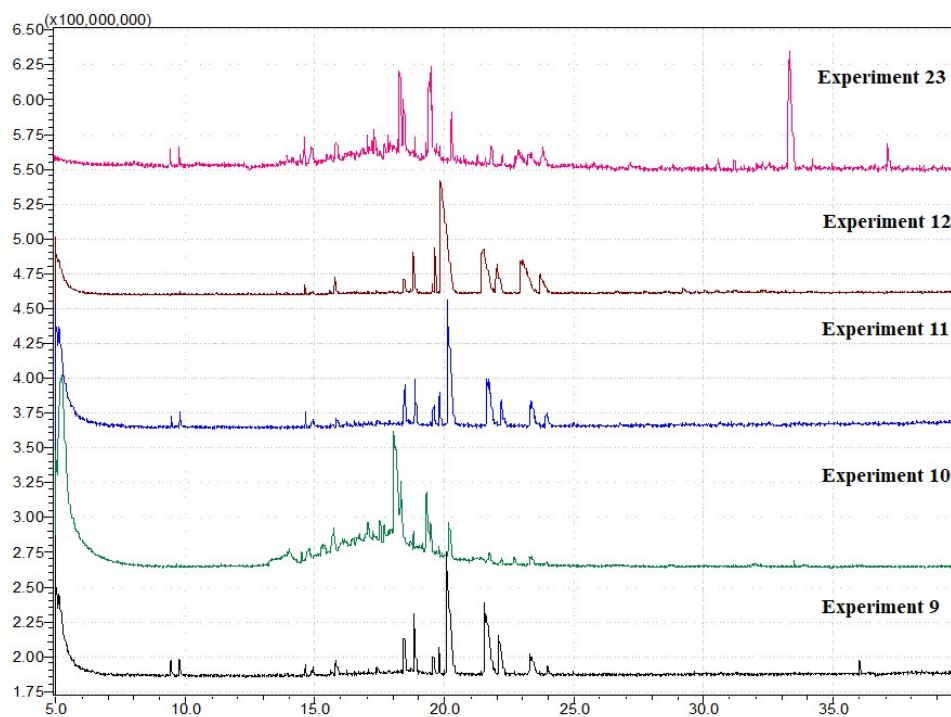

## 2. Chromatograms of the experiments of table 2

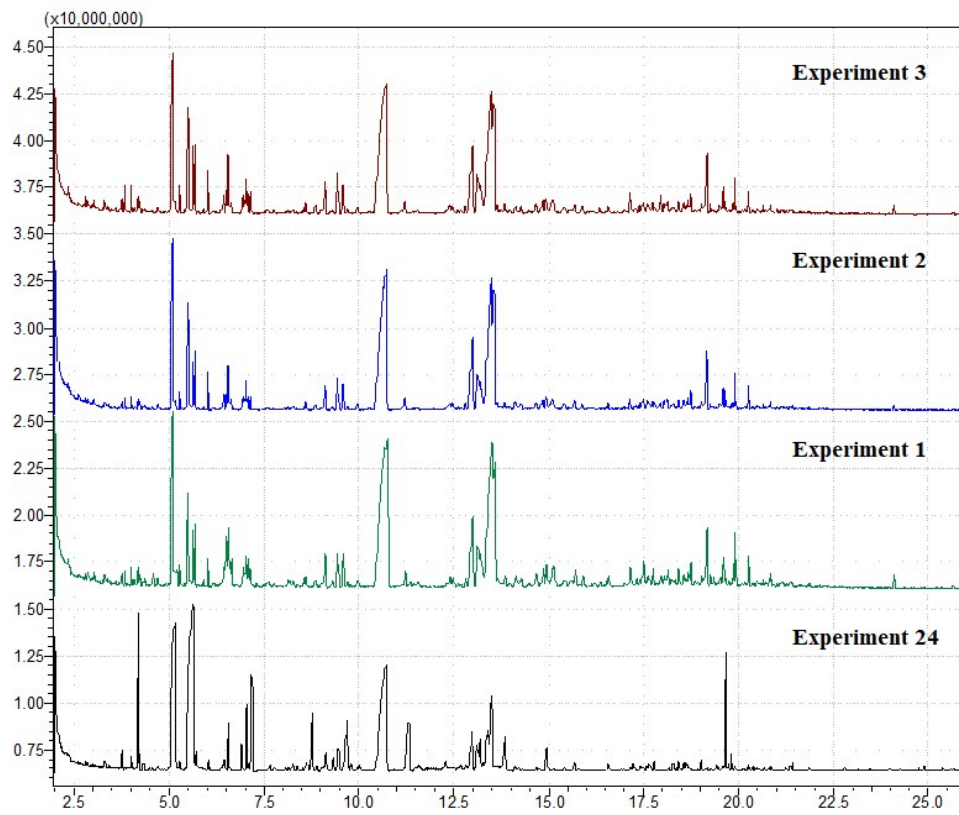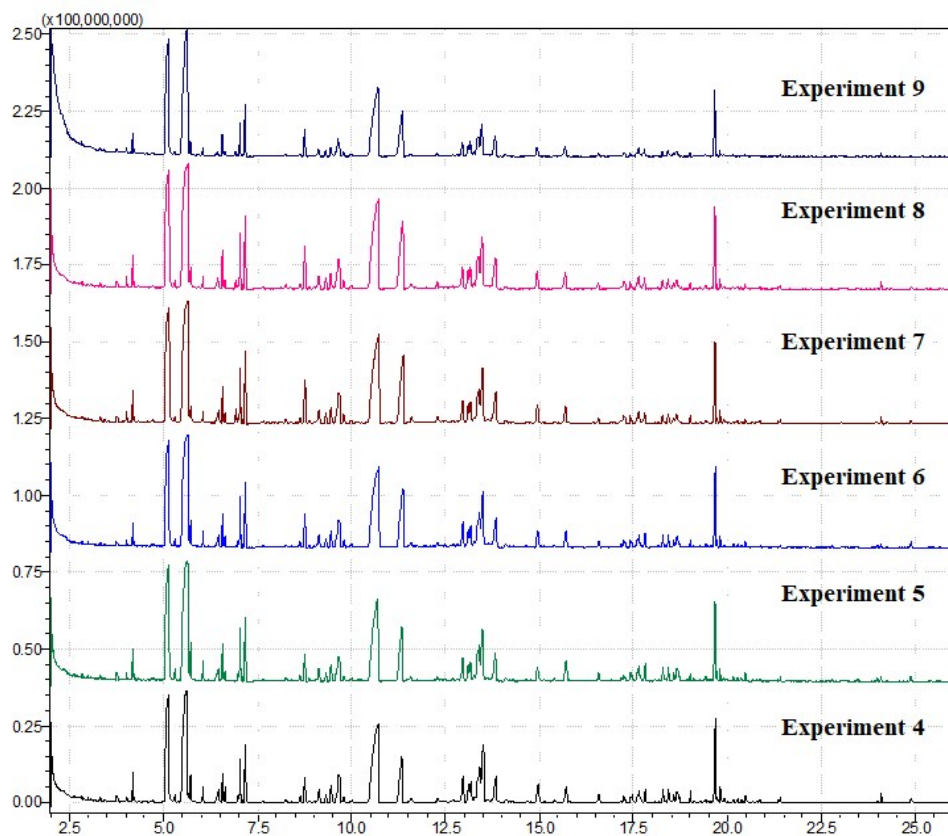

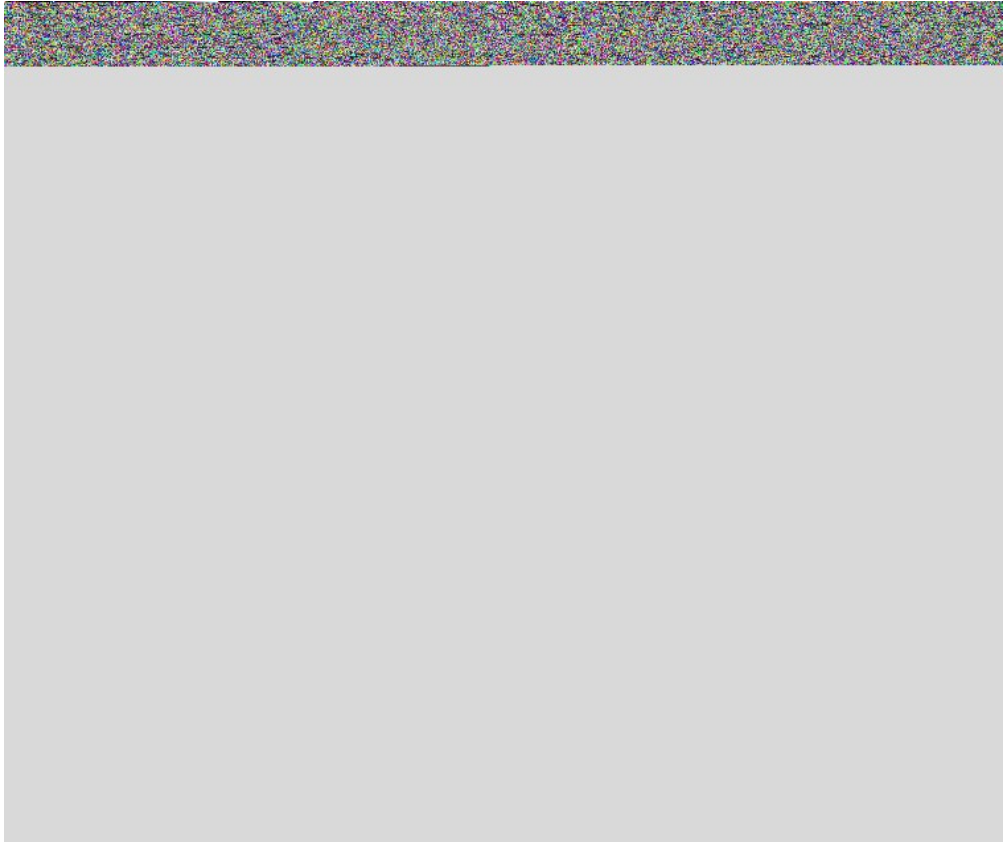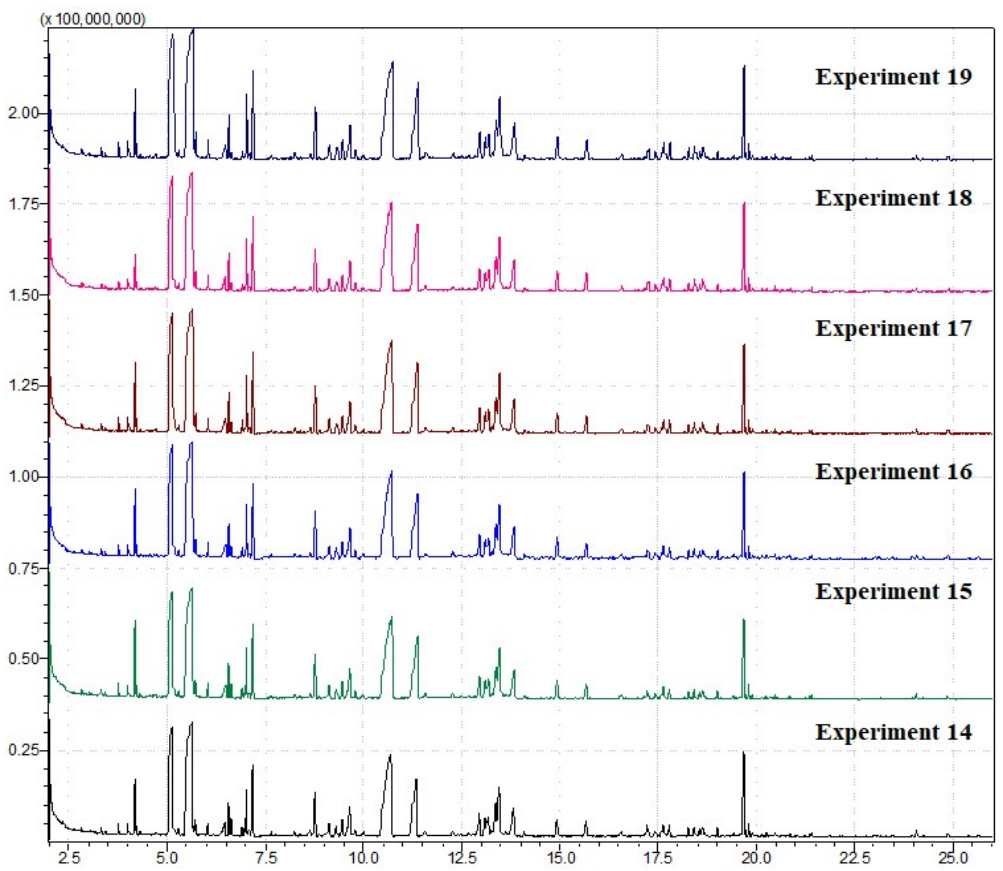

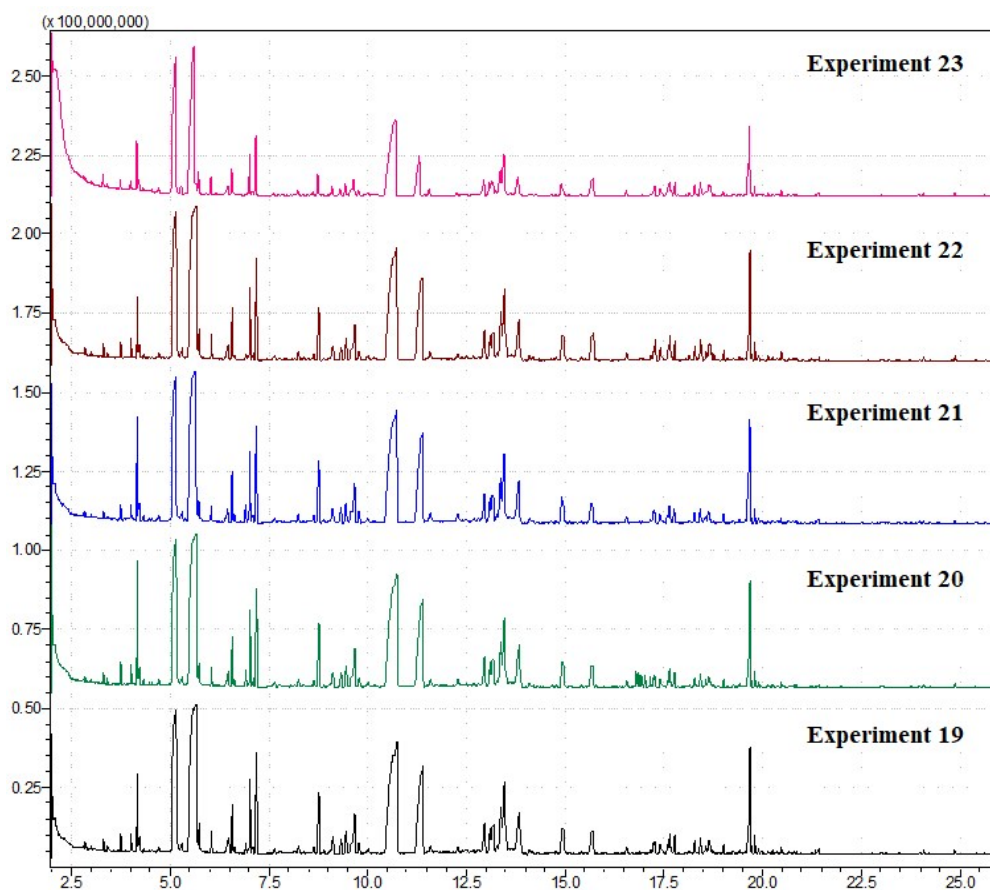

### 3. Chromatograms of the experiments of table 3

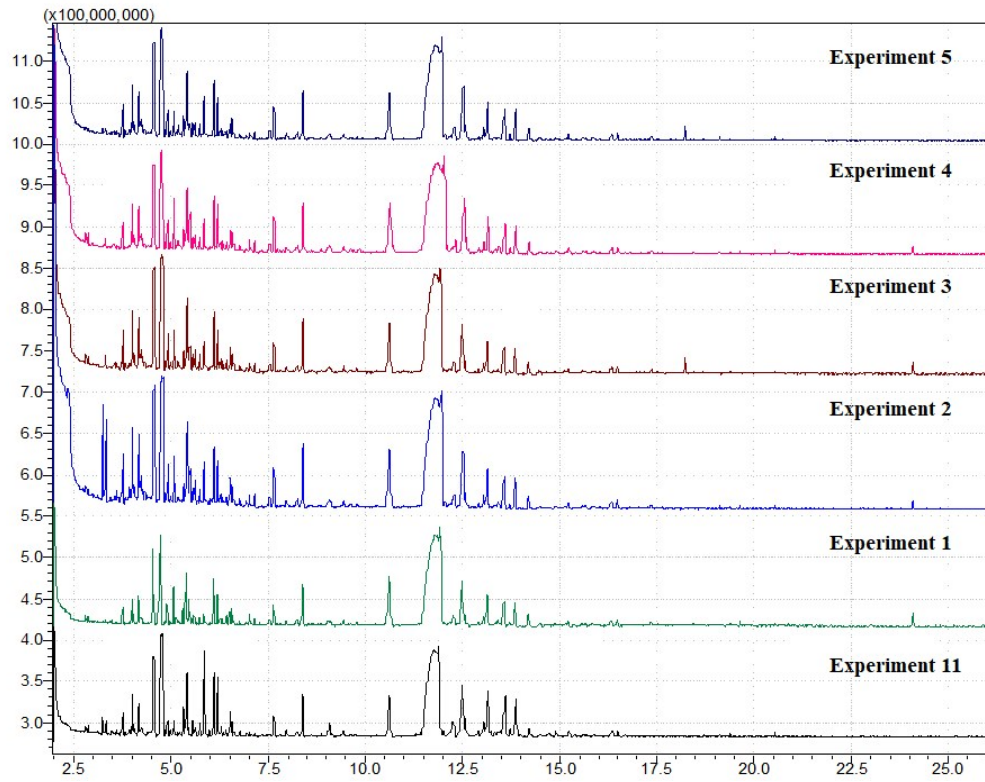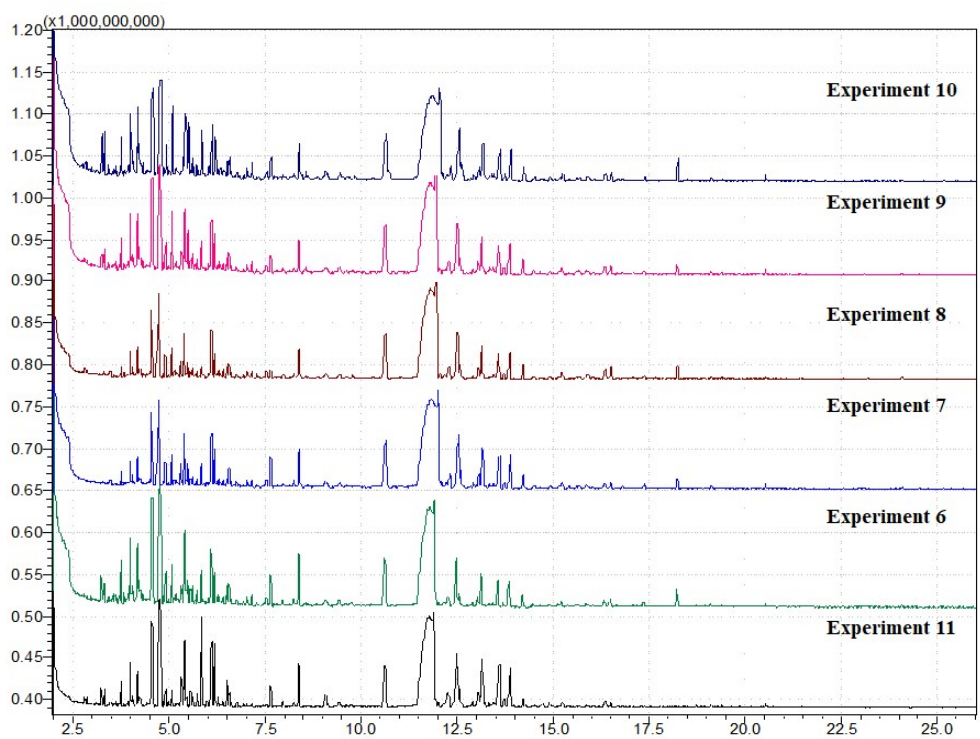

IV. Chemical compositions of the Essentials oils extracted by MAE in the experiments of table 1, 2 and 3.

Table S5: Chemical Composition of essential oil of the *Cymbopogon nardus* (*Citronella*)

|    | <b>Compound</b>                                                   | <b>% in<br/>Essential oil</b> |
|----|-------------------------------------------------------------------|-------------------------------|
| 1  | Citronellal                                                       | 1,66                          |
| 2  | Citronelol                                                        | 14,92                         |
| 3  | Geraniol                                                          | 20,92                         |
| 4  | $\beta$ -Citral                                                   | 0,71                          |
| 5  | Citronellyl butyrate                                              | 1,12                          |
| 6  | 3-Allyl-2-methoxyphenol                                           | 0,45                          |
| 7  | 3,7-Dimethyl-2,6-octadien-1-ol-acetate                            | 1,9                           |
| 8  | $\beta$ -elemene                                                  | 2,98                          |
| 9  | D-Germacrene                                                      | 2,45                          |
| 10 | 4-epi-cubedol                                                     | 0,85                          |
| 11 | $\beta$ -elemeno                                                  | 0,67                          |
| 12 | Germacrene D                                                      | 0,83                          |
| 13 | (+)-delta-Cadinene                                                | 2,27                          |
| 14 | Elemol                                                            | 19,22                         |
| 15 | Germacren D-4-ol                                                  | 9,44                          |
| 16 | gama-Eudesmol                                                     | 1,34                          |
| 17 | delta-Cedrol                                                      | 1,04                          |
| 18 | $\alpha$ -Cadinol                                                 | 1,07                          |
| 19 | $\beta$ -Eudesmol                                                 | 2,24                          |
| 20 | Ledol                                                             | 3,8                           |
| 21 | Elemol                                                            | 3,05                          |
| 22 | Farnesol                                                          | 1,16                          |
| 23 | 1-(4-Hydroxy-7-isopropyl-4-methyloctahydro-1H-inden-1-yl)ethanone | 0,89                          |
| 24 | (2E,6E)-2,6-Dimethyl-2,6-octadiene-1,8-diol                       | 0,5                           |
| 25 | 7-Hydroxyfarnesen                                                 | 0,73                          |
| 26 | Elemol                                                            | 0,56                          |
| 27 | [2-Methyl-2-(4-methyl-3-pentenyl)cyclopropyl]methanol             | 3,23                          |
|    | Total                                                             | 100                           |

Table S6: Chemical Composition of essential oil of *Eucalyptus sp.*

|    | <b>Compound</b>                                             | <b>% Essential Oil</b> |
|----|-------------------------------------------------------------|------------------------|
| 1  | $\beta$ Linalol                                             | 0,89                   |
| 2  | 2-Methylene cyclopentanol                                   | 1,62                   |
| 3  | (1R,2R,3R,5S)-(-)-Isopinocampheol                           | 0,79                   |
| 4  | (1R,2R,3R,5S)-(-)-Isopinocampheol                           | 1,85                   |
| 5  | (E)-3(10)-Caren-4-ol                                        | 0,69                   |
| 6  | Phellandral                                                 | 0,53                   |
| 7  | 4-Terpineol                                                 | 5                      |
| 8  | 1-Hydrindanone                                              | 10,6                   |
| 9  | cis-Piperitol                                               | 0,92                   |
| 10 | Longipinene epoxide                                         | 0,99                   |
| 11 | 5-Ethyl-3-hepten-2-one                                      | 0,65                   |
| 12 | p-Cumenol                                                   | 0,84                   |
| 13 | Cumaldehyde                                                 | 3,95                   |
| 14 | Phellandral                                                 | 1,26                   |
| 15 | Cuminol                                                     | 2,13                   |
| 16 | 2-Ethyl-4,5-dimethylphenol                                  | 1,21                   |
| 17 | 1,7-Dimethylbicyclo[5.2.0] nonane                           | 0,62                   |
| 18 | Isocaryophyllene                                            | 1,31                   |
| 19 | Aromadendreno                                               | 2,6                    |
| 20 | oxide de Caryophyllene                                      | 4,05                   |
| 21 | oxide de Caryophyllene                                      | 34,39                  |
| 22 | Ledol                                                       | 8,54                   |
| 23 | 1,2- epoxide Humulene                                       | 4,18                   |
| 24 | oxide-(II) Ledene                                           | 0,86                   |
| 25 | 4,4-dimethyl-Tetracyclo[6.3.2.0(2,5) 0(1,8)] tridecan-9-ol  | 0,72                   |
| 26 | Isoaromadendrene epoxide                                    | 2,03                   |
| 27 | Isoaromadendrene epoxide                                    | 2,05                   |
| 28 | Isoaromadendrene epoxide                                    | 1,83                   |
| 29 | 1b,5,5,6a-Tetramethyloctahydro-6H-indeno[1,2-b]oxiren-6-one | 0,81                   |
|    | Total                                                       | 97,91                  |

Table S7: Chemical Composition of essential oil of the *Piper aduncum*

|    | <b>Compound</b>                           | <b>% Essential Oil</b> |
|----|-------------------------------------------|------------------------|
| 1  | Hept-6-en-3-ol                            | 0,83                   |
| 2  | Hept-6-en-3-ol                            | 0,71                   |
| 3  | $\beta$ -Linalool                         | 42,64                  |
| 4  | Longipinene epoxide                       | 1,45                   |
| 5  | 1-Hydroxy-2-pentanone                     | 0,58                   |
| 6  | Hept-6-en-3-ol                            | 0,3                    |
| 7  | Hept-3-enol                               | 0,53                   |
| 8  | cis-Hex-3-enal                            | 0,45                   |
| 9  | trans-Cinnamaldehyde                      | 4,3                    |
| 10 | (Z,Z)- $\alpha$ -Farnesene                | 1,17                   |
| 11 | (Z,Z)- $\alpha$ -Farnesene                | 4,11                   |
| 12 | (2E,5E)-2,5-Octadiene                     | 0,64                   |
| 13 | Longipinene epoxide                       | 1,22                   |
| 14 | $\beta$ -Myrcene                          | 2,68                   |
| 15 | 2-[4-(1-Methyl-2-propenyl)phenyl]propanal | 1,94                   |
| 16 | Longipinene epoxide                       | 1,06                   |
| 17 | Longipinene epoxide                       | 0,79                   |
| 18 | Longipinene epoxide                       | 1,65                   |
| 19 | Longipinene epoxide                       | 17,36                  |
| 20 | Longipinene epoxide                       | 2,68                   |
| 21 | Methyl 3,6-octadecadiynoate               | 11,77                  |
|    | Total                                     | 98,86                  |

Table S8: Chemical Composition of essential oil of the *Piper hispidinervum*

|   | <b>Compound</b>                                                  | <b>% Essential Oil</b> |
|---|------------------------------------------------------------------|------------------------|
| 1 | 1-[(5Z)-5-(1-Hydroxyethylidene)-1,3-cyclopentadien-1-yl]ethanone | 1,67                   |
| 2 | Safrole                                                          | 84,65                  |
| 3 | 1-Nonyne                                                         | 0,46                   |
| 4 | 2,4,6-Trimethyl-1-nonene                                         | 5,97                   |
| 5 | Longipinene epoxide                                              | 6,07                   |
| 6 | p-Menth-8-en-2-ol, acetate                                       | 0,48                   |
| 7 | Ledol                                                            | 0,31                   |
| 8 | Isopropyl decanoate                                              | 0,39                   |
|   | Total                                                            | 100                    |
